RESEARCH ARTICLE

# Quantitative Profiling of Brain Lipid Raft Proteome in a Mouse Model of Fragile X Syndrome

Magdalena Kalinowska, Catherine Castillo, Anna Francesconi\*

Dominick P. Purpura Department of Neuroscience, Albert Einstein College of Medicine, Bronx, New York, New York, United States of America

\* [anna.francesconi@einstein.yu.edu](mailto:anna.francesconi@einstein.yu.edu)

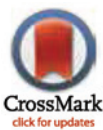

**OPEN ACCESS**

**Citation:** Kalinowska M, Castillo C, Francesconi A (2015) Quantitative Profiling of Brain Lipid Raft Proteome in a Mouse Model of Fragile X Syndrome. PLoS ONE 10(4): e0121464. doi:10.1371/journal.pone.0121464

**Academic Editor:** S.Hossein Fatemi, University of Minnesota, UNITED STATES

**Received:** June 29, 2014

**Accepted:** February 12, 2015

**Published:** April 7, 2015

**Copyright:** © 2015 Kalinowska et al. This is an open access article distributed under the terms of the [Creative Commons Attribution License](https://creativecommons.org/licenses/by/4.0/), which permits unrestricted use, distribution, and reproduction in any medium, provided the original author and source are credited.

**Data Availability Statement:** All relevant data are within the paper and its Supporting Information files.

**Funding:** This study was supported by a grant from Autism Speaks (grant # 7287), [www.autismspeaks.org](http://www.autismspeaks.org); and NIH grant MH082870 to A.F. The funders had no role in study design, data collection and analysis, decision to publish, or preparation of the manuscript.

**Competing Interests:** The authors have declared that no competing interests exist.

## Abstract

Fragile X Syndrome, a leading cause of inherited intellectual disability and autism, arises from transcriptional silencing of the FMR1 gene encoding an RNA-binding protein, Fragile X Mental Retardation Protein (FMRP). FMRP can regulate the expression of approximately 4% of brain transcripts through its role in regulation of mRNA transport, stability and translation, thus providing a molecular rationale for its potential pleiotropic effects on neuronal and brain circuitry function. Several intracellular signaling pathways are dysregulated in the absence of FMRP suggesting that cellular deficits may be broad and could result in homeostatic changes. Lipid rafts are specialized regions of the plasma membrane, enriched in cholesterol and glycosphingolipids, involved in regulation of intracellular signaling. Among transcripts targeted by FMRP, a subset encodes proteins involved in lipid biosynthesis and homeostasis, dysregulation of which could affect the integrity and function of lipid rafts. Using a quantitative mass spectrometry-based approach we analyzed the lipid raft proteome of Fmr1 knockout mice, an animal model of Fragile X syndrome, and identified candidate proteins that are differentially represented in Fmr1 knockout mice lipid rafts. Furthermore, network analysis of these candidate proteins reveals connectivity between them and predicts functional connectivity with genes encoding components of myelin sheath, axonal processes and growth cones. Our findings provide insight to aid identification of molecular and cellular dysfunctions arising from Fmr1 silencing and for uncovering shared pathologies between Fragile X syndrome and other autism spectrum disorders.

## Introduction

Genetic studies have uncovered hundreds of candidate *loci* [1, 2] associated with Autism Spectrum Disorders (ASDs). Despite remarkable progress, one major outstanding challenge is identification of shared biological pathways that could contribute to convergent dysfunctions arising from genetic heterogeneity [3, 4]. Fragile X syndrome (FXS), a leading cause of inherited intellectual disability, accounts for 2–5% of autism cases and ~30% of individuals with FXS are diagnosed with autism, suggesting that the conditions may share common pathophysiology

[5, 6]. FXS is a monogenic disorder that arises from abnormal expansion of a tri-nucleotide repeat in the 5'-untranslated region of the X-linked Fmr1 gene, leading to transcriptional silencing that results in loss of Fragile X Mental Retardation Protein (FMRP) expression [7]. FMRP is an RNA-binding protein that binds to >4% of brain transcripts [8, 9] to regulate mRNA translation, trafficking and stability [7, 10–12]. FMRP was shown to inhibit mRNA translation [7] and in its absence basal protein synthesis is abnormally elevated [13, 14]. Profound abnormalities in intracellular signaling pathways have also been observed in cells lacking FMRP. Cyclic AMP production is decreased [15, 16] whereas basal activities of Ras [17], extracellular signal-regulated protein kinases 1/2 (ERK1/2; [18, 19]), phosphatidylinositol-4,5-bisphosphate 3-kinase (PI3K; [20, 21]) and mammalian target of rapamycin (mTOR [22, 23]) are abnormally enhanced. In contrast, receptor dependent signaling is impaired including signaling by group 1 metabotropic glutamate receptors (Gp1 mGluRs) to ERK1/2 [19] and PI3K-AKT-mTOR [22, 24] pathways and signaling by dopamine receptor 1 (D1R) to the cAMP cascade [25]. Collectively, these findings suggest that loss of FMRP leads to general deficits in the efficiency and regulation of cellular signaling, dysfunctions that might be common to other disorders in the autism spectrum.

Lipid rafts (also termed membrane rafts) are liquid-ordered regions of the plasma membrane, originating from local enrichment in glycosphingolipids and cholesterol, that recruit selected integral membrane proteins and proteins carrying glycosylphosphatidylinositol (GPI) anchors: in addition, palmitoylated and acylated proteins associate with the inner leaflet of plasma membrane rafts [26, 27]. Lipid rafts are thought to provide transient 'platforms' for receptors and signaling effectors thereby contributing to regulation of cell signaling [28, 29]. Native lipid rafts are plastic, transient, small (~40–100 nm) membrane subdomains that are not amenable to biochemical purification; description of their putative composition as well as identification of properties shared by proteins endowed with raft affinity have largely originated from the characterization of detergent-resistant membranes (DRMs). DRMs are a collection of buoyant membranes resistant to solubilization by cold, non-ionic detergents and are selectively enriched in cholesterol, glycolipids and raft-associated proteins [30]. Importantly, DRMs are amenable to biochemical purification and thus afford a means of assessment of lipid raft composition under basal and perturbed conditions [31].

In the central nervous system (CNS), lipid rafts have been implicated in establishment of neuron polarity [32, 33], axon guidance [34], dendritogenesis [35], spine morphogenesis [36] and myelination [37, 38]. Lipid raft composition is remodeled during neuronal differentiation [34] and aging [39], and is altered in neuropsychiatric conditions [40] including Alzheimer's disease [41], schizophrenia [42], depression [43] and Smith-Lemli-Opitz syndrome [44]—an autism spectrum disorder [45, 46]. Despite the broad impact of Fmr1 ablation on neuronal signaling, it remains unknown whether the composition of lipid rafts is altered in animal models of FXS. A subset of RNA transcripts predicted to bind FMRP [8] encodes proteins critically involved in lipid synthesis and transport: thus, loss of FMRP expression may conceivably affect lipid homeostasis and lipid raft properties.

To examine whether loss of FMRP expression results in alterations in the properties of lipid rafts, we used a systems biology approach based on protein identification and quantification by mass spectrometry. We used isobaric tags for relative and absolute quantification (iTRAQ; [47]) to label peptides for qualitative and quantitative analysis of the proteome of DRMs purified from mouse brain. By this strategy we uncovered candidate proteins that are differentially represented in the lipid raft proteome of FMR1 knockout mice and linked them by network analysis to specific cellular components and functional pathways, such as axonal processes and myelination, which could be affected by ablation or silencing of Fmr1.

## Materials and Methods

### Reagents and animals

The following antibodies were used according to manufacturer recommendations: mouse monoclonal antibodies anti-Flotillin-1 (BD Biosciences), anti-Homer1b/c (Santa Cruz Biotechnology), anti-Ly6h (Abnova) anti-Plp1 (Millipore), anti-Thy-1 (BioLegend), anti-Transferrin receptor 1 (Invitrogen), anti- $\beta$ -Tubulin (Sigma Aldrich), anti- $\gamma$ -Tubulin (Sigma Aldrich) and rabbit polyclonal antibodies anti-CaMKII $\alpha/\beta$  Cell Signaling Technology) and anti-Gnb2 (Abcam). Mouse anti-Versican core protein (clone 351/24) was obtained from the UC Davis/NIH NeuroMab Facility. Wild type and Fmr1 null (FVB.129P2-*Pde6b*<sup>+</sup> strain) mice were obtained from The Jackson Laboratories (Bar Harbor, ME) and bred in house. For euthanasia, mice were deeply anesthetized by isoflurane inhalation until insensate and decapitated. All animal procedures were carried out according to protocols approved by the Albert Einstein College of Medicine Institutional Animal Care and Use Committee and in accordance with the Guide for the Care and Use of Laboratory Animals by the United States Public Health Service.

### Subcellular fractionation and western blot

Cortices (hippocampi removed), hippocampi and cerebella from adult WT and Fmr1 KO mice (~ five month-old) were homogenized on ice in homogenization buffer of 10 mM Tris-HCl pH 7.4, 5 mM EDTA, 320 mM sucrose, eukaryotic protease inhibitor cocktail and Na<sub>3</sub>VO<sub>4</sub>. Homogenates were centrifuged for 10 min at 800 x g to precipitate nuclei and supernatant fraction collected (S1) and centrifuged at 10,000 x g for 15 min. The resulting pellet (P2) and supernatant (S2) were separated and solubilized in lysis buffer containing 50 mM Tris-HCl pH 7.4, 150 mM NaCl, 1 mM EDTA, 1% Triton X-100, 0.5% CHAPS supplemented with protease inhibitor cocktail and Na<sub>3</sub>VO<sub>4</sub>. Analysis of proteins was performed by protein separation by SDS-PAGE followed by immunoblot with specific primary antibodies and detection with horseradish peroxidase-conjugated secondary antibodies as previously described [48].

### Isolation of detergent resistant membranes (DRM) from mouse brain tissue

DRM preparation was carried out according to previously described procedures [49]. Briefly, adult mice (~ five to six month-old) were euthanized and microdissected tissue rinsed with saline solution and homogenized with a Dounce tissue grinder in cold homogenization buffer with protease inhibitors. After low speed centrifugation to remove nuclei and residual particulate material, supernatants were spun at 10,000 x g at 4°C and resulting pellets dissolved in cold buffer of 50 mM Tris-HCl pH 7.4, 150 mM NaCl, 5 mM EDTA, 1% Triton X-100 (v/v) and incubated on ice (10 min). Solubilized pellets were adjusted to 40% sucrose and fractionated on discontinuous sucrose gradients by centrifugation at 34,000 rpm (SW40 Ti; Beckman Coulter) for 16 h. Thirteen fractions (1 ml each) were collected from each gradient starting from the top and an aliquot of each analyzed by Western blot.

### iTRAQ proteomics

We carried out proteomic profiling of WT and Fmr1 KO mice using purified DRMs labeled with iTRAQ reagents: samples were processed by Applied Biomics (Hayward, CA) for isotope labeling and analytical mass spectrometry. Briefly, DRMs were purified from freshly dissected cortices (hippocampi removed) from individual mice (three animals per genotype in one experiment and two animals per genotype in two experiments): fractions enriched in DRMs (routinely fractions # 3, 4, and 5) were combined for each genotype to yield approximately 6 or 9

ml collective volume, depending on number of animals, and concentrated. Equal amounts of protein for WT and Fmr1 KO mice, approximately 6 to 8  $\mu$ g depending on the preparation, were reduced and alkylated followed by digestion with trypsin and labeling with iTRAQ reagents (AB Sciex) with reporter ions/isobaric tags 114/113 or 118/117. Tagged peptides were combined and fractionated on a nano-LC column and analyzed by MS and MS/MS with ABSCIEX 5800 (AB Sciex). For protein identification, MS/MS spectra were submitted for search of the SwissProt and decoy databases using MASCOT. For each protein hit, only peptides with a confidence interval (C.I.) >95% were considered. Peptides corresponding to keratin, a potential contaminant, were excluded from final combined analysis of independent experiments. The ratios of peptide quantities expressed as signal intensity ratios of reporter groups for individual peaks were obtained to calculate average ratio(s) for the protein, number of peptides that contributed to the average and the geometric standard deviation. In some instances, a ratio could not be determined because one or more relevant peaks were missing or peptide match was rejected based on confidence interval.

### Gene ontology enrichment and protein interaction network analyses

Gene ontology (GO) analysis was carried out with the Database for Annotation, Visualization and Integrated Discovery (DAVID; [50, 51]). The database was searched using a subset of the brain raft proteome that included 85 genes encoding proteins for which comparative quantitative information was obtained, and used to assess enrichment in particular GO terms. Identified GO terms were grouped based on functional annotation for biological process (GO\_BP), cellular component (GO\_CC), and molecular function (GO\_MF). Functional annotation was carried out according to published protocols [50] with default settings and using *Mus musculus* genome as background reference database. Terms with Benjamini Hochberg-corrected  $p$  value <0.05 are illustrated. Network analysis was carried out using a query list of four genes encoding proteins that showed differential abundance in the brain raft proteome of Fmr1 KO mice using *Mus musculus* as reference. The query list did not include Tubb2a and Tubb5, encoding tubulin isoforms, to prevent skewing the network and Ly6h due to paucity of information for this gene. Analysis and representation of network connections were carried out with GeneMANIA [52] with default settings: predicted connectivity is illustrated by links which reflect degree of confidence of relationships between gene pairs.

## Results

### Characterization of mouse brain lipid raft proteome

In neurons, lipid rafts recruit ion channels and ionotropic neurotransmitter receptors, including glutamate and nicotinic acetylcholine receptors, and regulate the activity of metabotropic receptors for neurotransmitters and neuromodulators [53]. In Fmr1 null neurons, tonic activity of selected signaling effector proteins and metabotropic functions of Gp1 mGluRs, dopamine and cannabinoid [54] receptors among others are dysregulated, but whether the integrity and/or function of lipid rafts are compromised in absence of FMRP is unknown. Here, we set out to determine whether the relative abundance of proteins associated with raft membranes is altered by potential homeostatic changes occurring upon loss of FMRP expression. To examine whether the composition of the brain lipid raft proteome is altered in absence of FMRP, we used a well-characterized animal model of FXS—Fmr1 knockout mice (Fmr1 KO; [55]). To this end, we isolated detergent-resistant membranes (DRMs; [49]) from the cerebrum of adult wild type (WT) and mutant Fmr1 knockout (Fmr1 KO) mice to recover sufficient material for proteome analysis. We used anti-Flotillin-1 antibodies to identify membrane fractions enriched with lipid rafts and anti-Transferrin receptor 1 (TfR1) antibodies to visualize gradient fractions

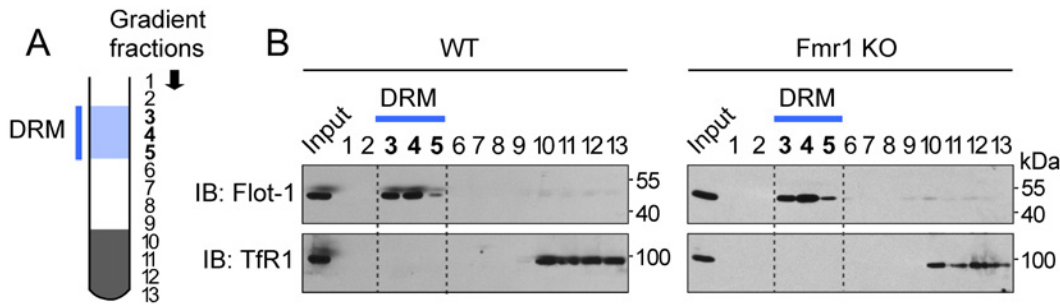

**Fig 1. Purification of lipid raft enriched membranes from wild type and Fmr1 mutant mouse brain.** A) Schematic of isopycnic sucrose gradient used in isolation procedure of detergent resistant membranes (DRMs). Light gradient fractions containing DRMs (fractions 3 to 5) and heavy gradient fractions containing non-raft proteins are indicated. B) Representative immunoblots of extracts from WT and Fmr1 KO mouse brain illustrating isolation of DRMs used for proteomic studies. Numbers above gel lanes indicate gradient fractions (#1, first fraction; #13, bottom gradient fraction). Input, total homogenate; Flot-1, Flotillin-1; Tfr1, Transferrin receptor 1; IB, immunoblot.

doi:10.1371/journal.pone.0121464.g001

containing non-raft membranes. Flotillin-1 is abundantly expressed in the brain and its selective association with raft membranes has been extensively characterized in both primary neurons and brain tissue [56] and thus represents a reliable marker of lipid raft enrichment. In contrast, Tfr1 is excluded from lipid raft membranes under resting or stimulated conditions [57] in both primary cells and native tissue and thus affords a reliable indicator of non-raft membranes. We found Flotillin-1 to be consistently enriched in three buoyant gradient fractions (fractions 3 to 5; Fig 1A) in both mutant and wild type mouse brain whereas Tfr1 appeared concentrated in heavy gradient fractions and virtually absent from buoyant, lipid raft enriched membranes (Fig 1B). Together, these observations indicate that DRMs purified from both Fmr1 KO and WT mouse cerebrum are overall enriched in lipid raft-associated proteins and not significantly contaminated by non-raft membranes, thus providing material of adequate purity for interrogation of the lipid raft proteome.

To systematically investigate the composition of the lipid raft proteome in Fmr1 KO mice and quantitatively compare the relative abundance of raft-associated proteins to WT mice, we used isobaric tags for relative and absolute quantification (iTRAQ; [47])-based mass spectrometry (Fig 2). We chose iTRAQ because it affords concurrent identification and quantification of peptides in complex mixtures in solution and can be applied to purified sub-cellular fractions. Moreover, iTRAQ does not require gel matrix-based protein isolation that may compromise recovery of integral membrane proteins and hydrophobic polypeptides. Peptides differentially labeled with iTRAQ tags are chromatographically indistinguishable due to mass conservation but when fragmented by tandem mass-spectrometry analysis a balance group is released and unmasked reporter ions allow relative quantification of peaks in mass spectra.

To implement iTRAQ workflow (Fig 2), DRM-containing gradient fractions were pooled to obtain sufficient material while decreasing individual variability: proteolytic peptides of mutant or wild type DRMs were independently labeled with different iTRAQ tags and then combined into one sample mixture that was analyzed by MS/MS. Three independent experiments were performed with mice from different litters: obtained peptide matches above identity threshold were 575 (FDR 1.22%), 796 (FDR 1.63%) and 257 (FDR 0.00%), respectively. High-confidence peptides for either genotypes identified 201, 293 and 140 protein hits from individual experiments, in good agreement with estimated raft proteome complexity of ~ 200 proteins [58, 59]. For data analysis, we combined independently obtained 2-plex datasets and compiled a list of 133 candidate proteins present in brain lipid rafts (Table 1) that includes proteins identified in both genotypes by high confidence peptides in at least one experiment (SI Table). Overall, the derived representation of the mouse brain lipid raft proteome is concordant with proteomic

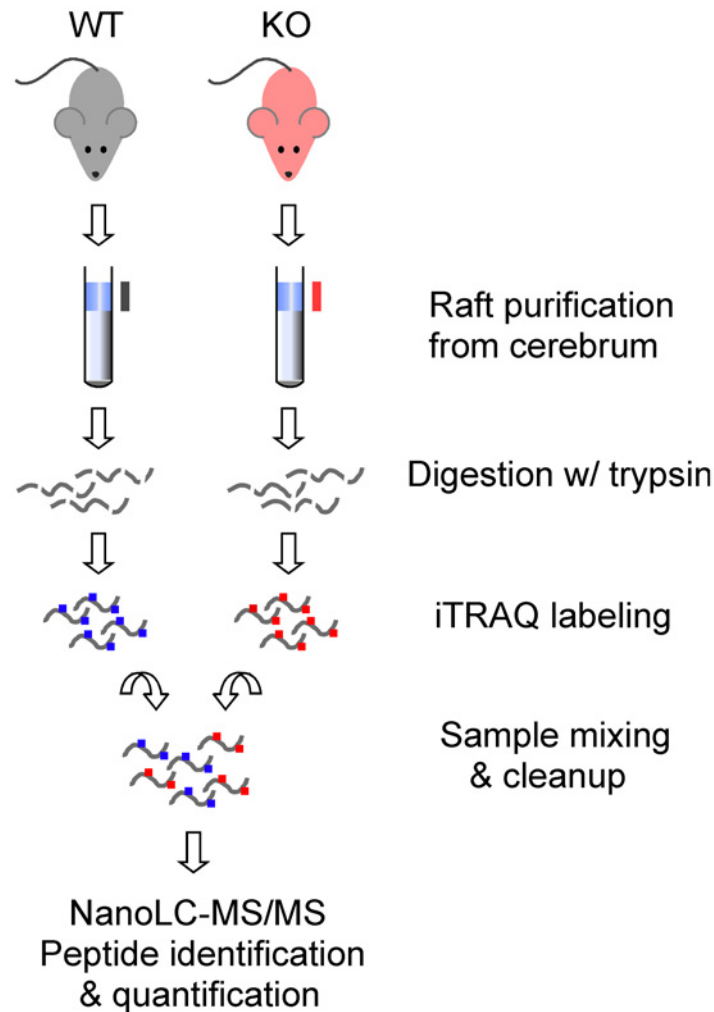

**Fig 2. Workflow of iTRAQ proteomic strategy.** Illustration of principal steps for qualitative and quantitative proteomic profiling of brain DRMs.

doi:10.1371/journal.pone.0121464.g002

studies previously performed employing alternative strategies [39, 58, 60–62] or tissue samples including neonatal mouse brain [58] and human brain tissue [62]. To evaluate the functions associated with proteins present in the lipid raft proteome of adult mouse brain, high confidence raft proteins identified in all three experiments (85 proteins; Table 2) were used to search the Database for Annotation, Visualization and Integrated Discovery (DAVID; [50, 51]) that allows identification of over-represented Gene Ontology (GO) terms in query protein/gene sets. Bioinformatics analysis with DAVID revealed that proteins present in brain lipid rafts were mostly associated with plasma membrane as expected (Table 3) but also enriched at synapses and cell projections and significantly associated with heterotrimeric G protein complexes. Molecular functions (Table 3) over-represented in the lipid raft proteome included ion and proton transport, ATPase and GTPase activity and component of myelin sheath. Moreover, brain lipid raft proteins appeared to be significantly associated with important biological processes (Table 3) involved in neuronal function and maturation including, but not limited to, synaptic transmission and cell adhesion.

**Table 1. Lipid raft proteome of adult mouse brain.**

| #  | UniProtKB | Gene symbol | Gene ID | Description                                                         | * | ** | ^ | ^^ | # |
|----|-----------|-------------|---------|---------------------------------------------------------------------|---|----|---|----|---|
| 1  | 1433B     | Ywhab       | 54401   | 14-3-3 protein beta/alpha                                           | ✓ |    |   |    |   |
| 2  | 1433E     | Ywhae       | 22627   | 14-3-3 protein epsilon                                              |   |    |   |    | ✓ |
| 3  | 1433G     | Ywhag       | 22628   | 14-3-3 protein gamma                                                |   | ✓  |   |    | ✓ |
| 4  | 1433Z     | Ywhaz       | 22631   | 14-3-3 protein zeta/delta                                           | ✓ | ✓  |   |    |   |
| 5  | AATM      | Got2        | 14719   | Aspartate aminotransferase, mitochondrial                           |   | ✓  |   |    |   |
| 6  | ACTB      | Actb        | 11461   | Actin, cytoplasmic 1                                                | ✓ | ✓  |   |    | ✓ |
| 7  | ACTC      | Actc1       | 11464   | Actin, alpha cardiac muscle 1                                       |   |    |   |    |   |
| 8  | ACTN1     | Actn1       | 109711  | Actinin-1                                                           |   |    |   |    |   |
| 9  | ACTN2     | Actn2       | 11472   | Actinin-2                                                           |   |    |   |    |   |
| 10 | ADT1      | Slc25a4     | 11739   | ADP/ATP translocase 1                                               | ✓ | ✓  | ✓ |    |   |
| 11 | ADT2      | Slc25a5     | 11740   | ADP/ATP translocase 2                                               | ✓ | ✓  |   |    |   |
| 12 | AGK       | Agk         | 69923   | Acylglycerol kinase, mitochondrial                                  |   |    |   |    |   |
| 13 | AINX      | Ina         | 226180  | Alpha-internexin                                                    |   |    |   |    |   |
| 14 | ALDOA     | Aldoa       | 11674   | Fructose-bisphosphate aldolase A                                    |   | ✓  |   |    |   |
| 15 | ANS1B     | Anks1b      | 77531   | Ankyrin repeat and sterile alpha motif domain-containing protein 1B |   |    |   |    |   |
| 16 | AT1A1     | Atp1a1      | 11928   | Na/K-transporting ATPase subunit alpha-1                            | ✓ |    |   |    |   |
| 17 | AT1A3     | Atp1a3      | 232975  | Na/K-transporting ATPase subunit alpha-3                            | ✓ | ✓  |   |    |   |
| 18 | AT1B1     | Atp1b1      | 11931   | Sodium/potassium-transporting ATPase subunit beta-1                 | ✓ | ✓  | ✓ |    |   |
| 19 | ATPA      | Atp5a1      | 11946   | ATP synthase subunit alpha, mitochondrial                           | ✓ |    | ✓ |    | ✓ |
| 20 | ATPB      | Atp5b       | 11947   | ATP synthase subunit beta, mitochondrial                            | ✓ | ✓  | ✓ |    | ✓ |
| 21 | BAIP2     | Baiap2      | 108100  | Brain-specific angiogenesis inhibitor 1-assoc. protein 2            | ✓ |    |   |    |   |
| 22 | BASP1     | Basp1       | 70350   | Brain acid soluble protein 1                                        | ✓ |    |   |    |   |
| 23 | BSN       | Bsn         | 12217   | Protein bassoon                                                     |   |    |   | ✓  |   |
| 24 | C1QBP     | C1qbp       | 12261   | Complement component 1 Q subcomponent-binding protein (mito)        |   |    |   |    | ✓ |
| 25 | CA2D1     | Cacna2d1    | 12293   | Voltage-dependent Ca channel subunit alpha-2/delta-1                | ✓ | ✓  | ✓ |    |   |
| 26 | CA2D2     | Cacna2d2    | 56808   | Voltage-dependent Ca channel subunit alpha-2/delta-2                |   |    |   |    | ✓ |
| 27 | CA2D3     | Cacna2d3    | 12294   | Voltage-dependent Ca channel subunit alpha-2/delta-3                |   |    |   |    |   |
| 28 | CAD13     | Cdh13       | 12554   | Cadherin-13                                                         | ✓ |    |   |    |   |
| 29 | CALM      | Calm1       | 12313   | Calmodulin                                                          |   |    |   |    |   |
| 30 | CLCB      | Cltb        | 74325   | Clathrin light chain B                                              |   |    |   |    | ✓ |
| 31 | CLCN6     | Clcn6       | 26372   | Chloride transport protein 6                                        | ✓ |    |   |    |   |
| 32 | CLD11     | Cldn11      | 18417   | Claudin-11                                                          |   |    |   |    |   |
| 33 | CLH1      | Cltc        | 67300   | Clathrin heavy chain 1                                              | ✓ | ✓  |   |    |   |
| 34 | CMC1      | Slc25a12    | 78830   | Calcium-binding mitochondrial carrier protein Aralar1               | ✓ |    |   |    |   |
| 35 | CN37      | Cnp         | 12799   | 2',3'-cyclic-nucleotide 3'-phosphodiesterase                        |   |    |   |    | ✓ |
| 36 | CNTN1     | Cntn1       | 12805   | Contactin-1                                                         | ✓ |    |   |    | ✓ |
| 37 | CNTN2     | Cntn2       | 21367   | Contactin-2                                                         | ✓ | ✓  | ✓ |    |   |
| 38 | CNTP1     | Cntnap1     | 53321   | Contactin-associated protein 1                                      |   |    |   | ✓  |   |
| 39 | COX2      | Mtco2       | 17709   | Cytochrome c oxidase subunit 2                                      | ✓ | ✓  |   |    |   |
| 40 | COX5A     | Cox5a       | 12858   | Cytochrome c oxidase subunit 5A, mitochondrial                      | ✓ |    |   |    |   |
| 41 | CSPG2     | Vcan        | 13003   | Versican core protein                                               |   |    |   |    | ✓ |
| 42 | CTNA2     | Ctnna2      | 12386   | Catenin alpha-2                                                     | ✓ |    |   |    |   |
| 43 | DLG4      | Dlg4        | 13385   | Disks large homolog 4                                               |   | ✓  |   |    |   |
| 44 | DLGP3     | Dlgap3      | 242667  | Disks large-associated protein 3                                    |   |    |   |    |   |
| 45 | DPYL2     | Dpysl2      | 12934   | Dihydropyrimidinase-related protein 2                               | ✓ |    |   |    |   |
| 46 | DYL1      | Dynll1      | 56455   | Dynein light chain 1, cytoplasmic                                   |   |    |   |    | ✓ |
| 47 | ENPP6     | Enpp6       | 320981  | Ectonucleotide pyrophosphatase/phosphodiesterase member 6           |   |    |   |    |   |

(Continued)

Table 1. (Continued)

| #  | UniProtKB | Gene symbol | Gene ID | Description                                                         | * | ** | ^ | ^^ | # |
|----|-----------|-------------|---------|---------------------------------------------------------------------|---|----|---|----|---|
| 48 | ERC2      | Erc2        | 238988  | ERC protein 2                                                       |   |    |   |    | ✓ |
| 49 | FLOT1     | Flot1       | 14251   | Flotillin-1                                                         | ✓ |    | ✓ |    |   |
| 50 | FLOT2     | Flot2       | 14252   | Flotillin-2                                                         | ✓ |    |   |    |   |
| 51 | G3P       | Gapdh       | 14433   | Glyceraldehyde-3-phosphate dehydrogenase                            |   |    |   |    | ✓ |
| 52 | GBB1      | Gnb1        | 14688   | Guanine nucleotide-binding protein G(I)/G(S)/G(T) subunit beta-1    | ✓ | ✓  |   |    |   |
| 53 | GBG12     | Gng12       | 14701   | Guanine nucleotide-binding protein G(I)/G(S)/G(O) subunit gamma12   | ✓ |    |   |    |   |
| 54 | GBG2      | Gng2        | 14702   | Guanine nucleotide-binding protein G(I)/G(S)/G(O) subunit gamma2    | ✓ |    |   |    |   |
| 55 | GNAI1     | Gnai1       | 14677   | Guanine nucleotide-binding protein G(i) subunit alpha1              | ✓ | ✓  |   |    |   |
| 56 | GNAI2     | Gnai2       | 14678   | Guanine nucleotide-binding protein G(i) subunit alpha2              |   |    | ✓ |    |   |
| 57 | GNAO      | Gnao1       | 14681   | Guanine nucleotide-binding protein G(o) subunit alpha               | ✓ | ✓  |   |    |   |
| 58 | GNAS1     | Gnas        | 14683   | Guanine nucleotide-binding protein G(s) subunit alpha isoforms XLas | ✓ |    |   |    |   |
| 59 | GNAZ      | Gnaz        | 14687   | Guanine nucleotide-binding protein G(z) subunit alpha               | ✓ | ✓  |   |    |   |
| 60 | HOME1     | Homer1      | 26556   | Homer protein homolog 1                                             |   | ✓  | ✓ |    |   |
| 61 | HPLN1     | Hapln1      | 12950   | Hyaluronan and proteoglycan link protein 1                          |   |    |   |    |   |
| 62 | HPLN2     | Hapln2      | 73940   | Hyaluronan and proteoglycan link protein 2                          |   |    |   |    |   |
| 63 | HS71L     | Hspa1l      | 15482   | Heat shock 70 kDa protein 1-like                                    |   |    | ✓ |    |   |
| 64 | HSP7C     | Hspa8       | 15481   | Heat shock cognate 71 kDa protein                                   | ✓ | ✓  |   |    | ✓ |
| 65 | HXK1      | Hk1         | 15275   | Hexokinase-1                                                        |   | ✓  |   |    |   |
| 66 | IGS21     | Igsf21      | 230868  | Immunoglobulin superfamily member 21                                |   |    |   |    |   |
| 67 | IQEC1     | Iqsec1      | 232227  | IQ motif and SEC7 domain-containing protein 1                       |   |    |   |    |   |
| 68 | IQEC2     | Iqsec2      | 245666  | IQ motif and SEC7 domain-containing protein 2                       |   |    |   |    |   |
| 69 | KCC2A     | Camk2a      | 12322   | Ca/calmodulin-dependent protein kinase type II $\alpha$ sub.        |   | ✓  |   | ✓  |   |
| 70 | KCC2B     | Camk2b      | 12323   | Ca/calmodulin-dependent protein kinase type II $\beta$ sub.         |   | ✓  |   | ✓  |   |
| 71 | KCC2D     | Camk2d      | 108058  | Ca/calmodulin-dependent protein kinase type II $\delta$ sub.        |   |    |   |    |   |
| 72 | KCC2G     | Camk2g      | 12325   | Ca/calmodulin-dependent protein kinase type II $\gamma$ sub.        |   |    | ✓ |    |   |
| 73 | KCRB      | Ckb         | 12709   | Creatine kinase B-type                                              | ✓ |    |   |    | ✓ |
| 74 | LSAMP     | Lsamp       | 268890  | Limbic system-associated membrane protein                           | ✓ |    |   |    |   |
| 75 | LY6H      | Ly6h        | 23934   | Lymphocyte antigen 6H                                               | ✓ |    |   |    |   |
| 76 | MAP1A     | Map1a       | 17754   | Microtubule-associated protein 1A                                   | ✓ |    |   |    |   |
| 77 | MBP       | Mbp         | 17196   | Myelin basic protein                                                |   | ✓  |   |    |   |
| 78 | MDHM      | Mdh2        | 17448   | Malate dehydrogenase, mitochondrial                                 | ✓ |    |   |    |   |
| 79 | ML12B     | Myl12b      | 67938   | Myosin regulatory light chain 12B                                   |   |    |   |    |   |
| 80 | MOBP      | Mobp        | 17433   | Myelin-associated oligodendrocyte basic protein                     |   | ✓  |   |    |   |
| 81 | MOG       | Mog         | 17441   | Myelin-oligodendrocyte glycoprotein                                 |   | ✓  | ✓ |    |   |
| 82 | MYH10     | Myh10       | 77579   | Myosin-10                                                           | ✓ | ✓  |   |    |   |
| 83 | MYH9      | Myh9        | 17886   | Myosin-9                                                            |   |    |   |    |   |
| 84 | MYL6      | Myl6        | 17904   | Myosin light polypeptide 6                                          |   |    |   |    |   |
| 85 | MYO5A     | Myo5a       | 17918   | Unconventional myosin-Va                                            |   |    |   |    |   |
| 86 | MYPR      | Plp1        | 18823   | Myelin proteolipid protein                                          |   |    |   |    |   |
| 87 | NCAM1     | Ncam1       | 17967   | Neural cell adhesion molecule 1                                     | ✓ |    | ✓ |    |   |
| 88 | NCAN      | Ncan        | 13004   | Neurocan core protein                                               |   |    |   | ✓  |   |
| 89 | NDUA4     | Ndufa4      | 17992   | NADH dehydrogenase 1 alpha subcomplex sub. 4                        | ✓ | ✓  |   |    |   |
| 90 | NEGR1     | Negr1       | 320840  | Neuronal growth regulator 1                                         | ✓ |    |   |    |   |
| 91 | NEUM      | Gap43       | 14432   | Neuromodulin                                                        | ✓ | ✓  |   |    |   |
| 92 | NFL       | Nefl        | 18039   | Neurofilament light polypeptide                                     |   |    |   |    |   |
| 93 | NFM       | Nefm        | 18040   | Neurofilament medium polypeptide                                    |   |    |   |    |   |
| 94 | NTRI      | Ntm         | 235106  | Neurotrimin                                                         | ✓ | ✓  |   |    |   |

(Continued)



Table 1. (Continued)

| #   | UniProtKB | Gene symbol | Gene ID | Description                                                                                              | * | ** | ^ | ^^ | # |
|-----|-----------|-------------|---------|----------------------------------------------------------------------------------------------------------|---|----|---|----|---|
| 95  | ODO2      | Dlst        | 78920   | Dihydrolipoyllysine-residue succinyltransferase component of 2-oxoglutarate dehydrogenase complex (mito) |   | ✓  |   |    |   |
| 96  | ODP2      | Dlat        | 235339  | Dihydrolipoyllysine-residue acetyltransferase component of pyruvate dehydrogenase complex (mito)         |   | ✓  |   |    | ✓ |
| 97  | OMGP      | Omg         | 18377   | Oligodendrocyte-myelin glycoprotein                                                                      |   |    |   | ✓  |   |
| 98  | PCLO      | Pclo        | 26875   | Protein piccolo                                                                                          |   |    |   |    |   |
| 99  | PRIO      | Prnp        | 19122   | Major prion protein                                                                                      |   | ✓  |   |    |   |
| 100 | RAC1      | Rac1        | 19353   | Ras-related C3 botulinum toxin substrate 1                                                               | ✓ |    |   |    |   |
| 101 | SCAI      | Scai        | 320271  | Protein SCAI                                                                                             |   |    |   |    |   |
| 102 | SEPT7     | Sept7       | 235072  | Septin-7                                                                                                 |   | ✓  |   |    | ✓ |
| 103 | SHAN3     | Shank3      | 58234   | SH3 and multiple ankyrin repeat domains protein 3                                                        |   | ✓  |   |    |   |
| 104 | SNP25     | Snap25      | 20614   | Synaptosomal-associated protein 25                                                                       | ✓ | ✓  |   |    |   |
| 105 | SPTA2     | Sptan1      | 20740   | Spectrin alpha chain, brain                                                                              | ✓ | ✓  |   |    |   |
| 106 | SPTB2     | Sptbn1      | 20742   | Spectrin beta chain, brain 1                                                                             |   | ✓  |   |    |   |
| 107 | STX1B     | Stx1b       | 56216   | Syntaxin-1B                                                                                              | ✓ | ✓  |   |    | ✓ |
| 108 | SYGP1     | Syngap1     | 240057  | Ras GTPase-activating protein SynGAP                                                                     |   | ✓  |   |    |   |
| 109 | SYPH      | Syp         | 20977   | Synaptophysin                                                                                            |   | ✓  |   |    |   |
| 110 | SYT1      | Syt1        | 20979   | Synaptotagmin-1                                                                                          | ✓ | ✓  |   |    |   |
| 111 | SYT2      | Syt2        | 20980   | Synaptotagmin-2                                                                                          |   |    |   |    |   |
| 112 | TBA1A     | Tuba1a      | 22142   | Tubulin alpha-1A chain                                                                                   |   | ✓  |   |    | ✓ |
| 113 | TBA1B     | Tuba1b      | 22143   | Tubulin alpha-1B chain                                                                                   | ✓ |    |   |    | ✓ |
| 114 | TBA3      | Tuba3a      | 22144   | Tubulin alpha-3 chain                                                                                    |   |    |   |    |   |
| 115 | TBA4A     | Tuba4a      | 22145   | Tubulin alpha-4A chain                                                                                   |   |    |   |    |   |
| 116 | TBB2A     | Tubb2a      | 22151   | Tubulin beta-2A chain                                                                                    |   | ✓  |   |    | ✓ |
| 117 | TBB3      | Tubb3       | 22152   | Tubulin beta-3 chain                                                                                     | ✓ |    |   |    |   |
| 118 | TBB4A     | Tubb4a      | 22153   | Tubulin beta-4A chain                                                                                    | ✓ |    |   |    |   |
| 119 | TBB4B     | Tubb4b      | 227613  | Tubulin beta-4B chain                                                                                    | ✓ |    |   |    |   |
| 120 | TBB5      | Tubb5       | 22154   | Tubulin beta-5 chain                                                                                     | ✓ |    |   |    |   |
| 121 | THY1      | Thy1        | 21838   | Thy-1 membrane glycoprotein                                                                              | ✓ | ✓  | ✓ |    |   |
| 122 | TPM3      | Tpm3        | 59069   | Tropomyosin alpha-3 chain                                                                                |   |    |   |    |   |
| 123 | VA0D1     | Atp6v0d1    | 11972   | V-type proton ATPase subunit d 1                                                                         | ✓ | ✓  |   |    |   |
| 124 | VAMP2     | Vamp2       | 22318   | Vesicle-associated membrane protein 2                                                                    | ✓ | ✓  |   |    |   |
| 125 | VATA      | Atp6v1a     | 11964   | V-type proton ATPase catalytic subunit A                                                                 |   | ✓  | ✓ |    |   |
| 126 | VATB2     | Atp6v1b2    | 11966   | V-type proton ATPase subunit B, brain isoform                                                            | ✓ |    | ✓ |    |   |
| 127 | VATC1     | Atp6v1c1    | 66335   | V-type proton ATPase subunit C 1                                                                         |   | ✓  | ✓ |    |   |
| 128 | VATD      | Atp6v1d     | 73834   | V-type proton ATPase subunit D                                                                           |   |    | ✓ |    |   |
| 129 | VATE1     | Atp6v1e1    | 11973   | V-type proton ATPase subunit E 1                                                                         |   | ✓  | ✓ |    |   |
| 130 | VATF      | Atp6v1f     | 66144   | V-type proton ATPase subunit F                                                                           |   |    |   |    |   |
| 131 | VATG2     | Atp6v1g2    | 66237   | V-type proton ATPase subunit G 2                                                                         |   |    |   |    |   |
| 132 | VDAC1     | Vdac1       | 22333   | Voltage-dependent anion-selective channel protein 1                                                      | ✓ | ✓  | ✓ |    | ✓ |
| 133 | VPP1      | Atp6v0a1    | 11975   | V-type proton ATPase 116 kDa subunit a isoform 1                                                         | ✓ | ✓  | ✓ |    |   |

(✓), Identified in corresponding proteomic studies: \* [58], \*\* [61], ^ [62], ^^ [60], # [39]. List of all proteins (133) identified in DRMs from adult WT and Fmr1 KO mouse brain. List includes proteins identified in three, two or one experiment. Entry descriptors: UniProtKB, UniProt Knowledgebase database (UniProtKB/Swiss-Prot) *Mus musculus* protein entry name; gene symbol, *Mus musculus*; Entrez Gene ID, National Center for Biotechnology Information (NCBI) Entrez *Mus musculus* gene ID. Columns annotated with symbols (\*, \*\*, ^, ^^, #) correspond to proteomic studies listed in appended references that reported identification of the corresponding protein in lipid rafts.

doi:10.1371/journal.pone.0121464.t001

**Table 2. Quantitative profiling of lipid raft proteome in WT and Fmr1 KO mouse brain.**

| #         | UniProtKB    | Gene symbol | Entrez ID     | Ave KO/WT   | Sdev         | P-value      |    | Description                                                         |
|-----------|--------------|-------------|---------------|-------------|--------------|--------------|----|---------------------------------------------------------------------|
| 1         | 1433B        | Ywhab       | 54401         | 0.99        | 0.375        | 0.909        | ns | 14-3-3 protein beta/alpha                                           |
| 2         | AATM         | Got2        | 14719         | 1.07        | 0.537        | 0.865        | ns | Aspartate aminotransferase, mitochondrial                           |
| 3         | ACTB         | Actb        | 11461         | 0.97        | 0.110        | 0.560        | ns | Actin, cytoplasmic 1                                                |
| 4         | ACTC         | Actc1       | 11464         | 0.99        | 0.124        | 0.758        | ns | Actin, alpha cardiac muscle 1                                       |
| 5         | ADT1         | Slc25a4     | 11739         | 0.90        | 0.240        | 0.485        | ns | ADP/ATP translocase 1                                               |
| 6         | ADT2         | Slc25a5     | 11740         | 0.95        | 0.254        | 0.712        | ns | ADP/ATP translocase 2                                               |
| 7         | ANS1B        | Anks1b      | 77531         | 1.05        | 0.099        | 0.588        | ns | Ankyrin repeat and sterile alpha motif domain-containing protein 1B |
| 8         | AT1A3        | Atp1a3      | 232975        | 1.08        | 0.021        | 0.180        | ns | Sodium/potassium-transporting ATPase subunit alpha-3                |
| 9         | AT1B1        | Atp1b1      | 11931         | 1.22        | 0.601        | 0.591        | ns | Sodium/potassium-transporting ATPase subunit beta-1                 |
| 10        | ATPA         | Atp5a1      | 11946         | 0.92        | 0.121        | 0.304        | ns | ATP synthase subunit alpha, mitochondrial                           |
| 11        | ATPB         | Atp5b       | 11947         | 0.91        | 0.164        | 0.366        | ns | ATP synthase subunit beta, mitochondrial                            |
| 12        | BAIP2        | Baiap2      | 108100        | 1.29        | 0.335        | 0.237        | ns | Brain-specific angiogenesis inhibitor 1-associated protein 2        |
| 13        | BASP1        | Basp1       | 70350         | 1.13        | 0.070        | 0.101        | ns | Brain acid soluble protein 1                                        |
| 14        | BSN          | Bsn         | 12217         | 1.13        | 0.112        | 0.204        | ns | Protein bassoon                                                     |
| 15        | C1QBP        | C1qbp       | 12261         | 0.99        | 0.217        | 0.886        | ns | Complement component 1 Q subcomponent-binding protein, (mito)       |
| 16        | CA2D1        | Cacna2d1    | 12293         | 0.99        | 0.111        | 0.736        | ns | Voltage-dependent calcium channel subunit alpha-2/delta-1           |
| 17        | CA2D3        | Cacna2d3    | 12294         | 0.79        | 0.137        | 0.065        | ns | Voltage-dependent calcium channel subunit alpha-2/delta-3           |
| 18        | CAD13        | Cdh13       | 12554         | 0.93        | 0.130        | 0.376        | ns | Cadherin-13                                                         |
| 19        | CALM         | Calm1       | 12313         | 0.85        | 0.169        | 0.186        | ns | Calmodulin                                                          |
| 20        | CLH1         | Cltc        | 67300         | 0.92        | 0.205        | 0.479        | ns | Clathrin heavy chain 1                                              |
| 21        | CN37         | Cnp         | 12799         | 1.32        | 0.244        | 0.101        | ns | 2',3'-cyclic-nucleotide 3'-phosphodiesterase                        |
| 22        | CNTN1        | Cntn1       | 12805         | 0.89        | 0.125        | 0.203        | ns | Contactin-1                                                         |
| 23        | CNTN2        | Cntn2       | 21367         | 0.88        | 0.222        | 0.363        | ns | Contactin-2                                                         |
| 24        | COX2         | Mtco2       | 17709         | 1.04        | 0.158        | 0.776        | ns | Cytochrome c oxidase subunit 2                                      |
| 25        | COX5A        | Cox5a       | 12858         | 1.02        | 0.491        | 0.974        | ns | Cytochrome c oxidase subunit 5A, mitochondrial                      |
| <b>26</b> | <b>CSPG2</b> | <b>Vcan</b> | <b>13003</b>  | <b>0.82</b> | <b>0.079</b> | <b>0.031</b> | *  | <b>Versican core protein</b>                                        |
| 27        | DLG4         | Dlg4        | 13385         | 0.94        | 0.236        | 0.631        | ns | Disks large homolog 4                                               |
| 28        | ENPP6        | Enpp6       | 320981        | 1.22        | 0.340        | 0.366        | ns | Ectonucleotide pyrophosphatase/phosphodiesterase 6                  |
| <b>29</b> | <b>ERC2</b>  | <b>Erc2</b> | <b>238988</b> | <b>1.17</b> | <b>0.066</b> | <b>0.042</b> | *  | <b>ERC protein 2</b>                                                |
| 30        | FLOT1        | Flot1       | 14251         | 0.80        | 0.146        | 0.084        | ns | Flotillin-1                                                         |
| 31        | FLOT2        | Flot2       | 14252         | 1.10        | 0.101        | 0.280        | ns | Flotillin-2                                                         |
| 32        | GBB1         | Gnb1        | 14688         | 0.76        | 0.264        | 0.186        | ns | Guanine nucleotide-binding protein G(I)/G(S)/G(T) subunit beta-1    |
| 33        | GBG12        | Gng12       | 14701         | 1.29        | 0.860        | 0.608        | ns | Guanine nucleotide-binding protein G(I)/G(S)/G(O) subunit gamma-12  |
| 34        | GBG2         | Gng2        | 14702         | 1.28        | 0.226        | 0.121        | ns | Guanine nucleotide-binding protein G(I)/G(S)/G(O) subunit gamma-2   |
| 35        | GNAO         | Gnao1       | 14681         | 1.19        | 0.229        | 0.259        | ns | Guanine nucleotide-binding protein G(o) subunit alpha               |
| 36        | GNAS1        | Gnas        | 14683         | 1.14        | 0.361        | 0.581        | ns | Guanine nucleotide-binding protein G(s) subunit alpha isoforms XLas |
| 37        | GNAZ         | Gnaz        | 14687         | 1.12        | 0.251        | 0.516        | ns | Guanine nucleotide-binding protein G(z) subunit alpha               |
| 38        | HOME1        | Homer1      | 26556         | 1.31        | 0.280        | 0.148        | ns | Homer protein homolog 1                                             |
| 39        | HSP7C        | Hspa8       | 15481         | 1.01        | 0.064        | >0.999       | ns | Heat shock cognate 71 kDa protein                                   |
| 40        | IGS21        | Igsf21      | 230868        | 1.01        | 0.083        | 0.918        | ns | Immunoglobulin superfamily member 21                                |
| 41        | KCC2A        | Camk2a      | 12322         | 1.27        | 0.299        | 0.215        | ns | Calcium/calmodulin-dependent protein kinase type II subunit alpha   |
| 42        | KCC2B        | Camk2b      | 12323         | 1.24        | 0.365        | 0.343        | ns | Calcium/calmodulin-dependent protein kinase type II subunit beta    |
| 43        | KCC2G        | Camk2g      | 12325         | 1.21        | 0.331        | 0.362        | ns | Calcium/calmodulin-dependent protein kinase type II subunit gamma   |
| 44        | KCRB         | Ckb         | 12709         | 0.85        | 0.124        | 0.108        | ns | Creatine kinase B-type                                              |
| 45        | LSAMP        | Lsamp       | 268890        | 0.94        | 0.142        | 0.443        | ns | Limbic system-associated membrane protein                           |
| <b>46</b> | <b>LY6H</b>  | <b>Ly6h</b> | <b>23934</b>  | <b>0.76</b> | <b>0.020</b> | <b>0.003</b> | ** | <b>Lymphocyte antigen 6H</b>                                        |

(Continued)

Table 2. (Continued)

| #         | UniProtKB    | Gene symbol   | Entrez ID    | Ave KO/WT   | Sdev         | P-value      |           | Description                                                                           |
|-----------|--------------|---------------|--------------|-------------|--------------|--------------|-----------|---------------------------------------------------------------------------------------|
| 47        | MAP1A        | Map1a         | 17754        | 1.06        | 0.097        | 0.499        | ns        | Microtubule-associated protein 1A                                                     |
| 48        | MBP          | Mbp           | 17196        | 1.35        | 0.318        | 0.144        | ns        | Myelin basic protein                                                                  |
| 49        | MDHM         | Mdh2          | 17448        | 0.85        | 0.327        | 0.444        | ns        | Malate dehydrogenase, mitochondrial                                                   |
| 50        | MOBP         | Mobp          | 17433        | 1.47        | 0.345        | 0.089        | ns        | Myelin-associated oligodendrocyte basic protein                                       |
| 51        | MOG          | Mog           | 17441        | 1.31        | 0.185        | 0.060        | ns        | Myelin-oligodendrocyte glycoprotein                                                   |
| 52        | MYH10        | Myh10         | 77579        | 1.02        | 0.245        | 0.966        | ns        | Myosin-10                                                                             |
| 53        | MYH9         | Myh9          | 17886        | 1.14        | 0.668        | 0.760        | ns        | Myosin-9                                                                              |
| 54        | MYO5A        | Myo5a         | 17918        | 1.05        | 0.136        | 0.720        | ns        | Unconventional myosin-Va                                                              |
| <b>55</b> | <b>MYPR</b>  | <b>Plp1</b>   | <b>18823</b> | <b>1.55</b> | <b>0.176</b> | <b>0.008</b> | <b>**</b> | <b>Myelin proteolipid protein</b>                                                     |
| 56        | NCAM1        | Ncam1         | 17967        | 1.00        | 0.128        | 0.880        | ns        | Neural cell adhesion molecule 1                                                       |
| 57        | NCAN         | Ncan          | 13004        | 1.02        | 0.427        | 0.990        | ns        | Neurocan core protein                                                                 |
| 58        | NEGR1        | Negr1         | 320840       | 1.01        | 0.209        | 0.980        | ns        | Neuronal growth regulator 1                                                           |
| 59        | NTRI         | Ntm           | 235106       | 0.97        | 0.101        | 0.566        | ns        | Neurotrimin                                                                           |
| 60        | ODO2         | Dlst          | 78920        | 1.15        | 0.267        | 0.448        | ns        | Dihydrolipoyllysine succinyltransferase comp. of 2-oxoglutarate dehydrogenase complex |
| 61        | ODP2         | Dlat          | 235339       | 1.03        | 0.150        | 0.894        | ns        | Dihydrolipoyllysine acetyltransferase comp. of pyruvate dehydrogenase complex         |
| 62        | OMGP         | Omg           | 18377        | 1.12        | 0.044        | 0.076        | ns        | Oligodendrocyte-myelin glycoprotein                                                   |
| 63        | PCLO         | Pclo          | 26875        | 1.08        | 0.015        | 0.140        | ns        | Protein piccolo                                                                       |
| 64        | PRIO         | Prnp          | 19122        | 0.84        | 0.142        | 0.126        | ns        | Major prion protein                                                                   |
| 65        | RAC1         | Rac1          | 19353        | 1.28        | 0.381        | 0.293        | ns        | Ras-related C3 botulinum toxin substrate 1                                            |
| 66        | SCAI         | Scai          | 320271       | 1.46        | 0.971        | 0.471        | ns        | Protein SCAI                                                                          |
| 67        | 7-Sep        | Sept7         | 235072       | 1.45        | 0.272        | 0.052        | ns        | Septin-7                                                                              |
| 68        | SHAN3        | Shank3        | 58234        | 1.01        | 0.284        | 0.970        | ns        | SH3 and multiple ankyrin repeat domains protein 3                                     |
| 69        | SNP25        | Snap25        | 20614        | 1.10        | 0.551        | 0.800        | ns        | Synaptosomal-associated protein 25                                                    |
| 70        | SPTA2        | Sptan1        | 20740        | 0.97        | 0.157        | 0.681        | ns        | Spectrin alpha chain, brain                                                           |
| 71        | SPTB2        | Sptbn1        | 20742        | 0.97        | 0.099        | 0.530        | ns        | Spectrin beta chain, brain 1                                                          |
| 72        | STX1B        | Stx1b         | 56216        | 1.05        | 0.445        | 0.895        | ns        | Syntaxin-1B                                                                           |
| 73        | SYGP1        | Syngap1       | 240057       | 1.09        | 0.106        | 0.344        | ns        | Ras GTPase-activating protein SynGAP                                                  |
| 74        | SYT1         | Syt1          | 20979        | 0.90        | 0.236        | 0.456        | ns        | Synaptotagmin-1                                                                       |
| 75        | TBA1B        | Tuba1b        | 22143        | 1.21        | 0.155        | 0.113        | ns        | Tubulin alpha-1B chain                                                                |
| <b>76</b> | <b>TBB2A</b> | <b>Tubb2a</b> | <b>22151</b> | <b>1.29</b> | <b>0.155</b> | <b>0.045</b> | <b>*</b>  | <b>Tubulin beta-2A chain</b>                                                          |
| <b>77</b> | <b>TBB5</b>  | <b>Tubb5</b>  | <b>22154</b> | <b>1.27</b> | <b>0.125</b> | <b>0.034</b> | <b>*</b>  | <b>Tubulin beta-5 chain</b>                                                           |
| <b>78</b> | <b>THY1</b>  | <b>Thy1</b>   | <b>21838</b> | <b>0.66</b> | <b>0.132</b> | <b>0.014</b> | <b>*</b>  | <b>Thy-1 membrane glycoprotein</b>                                                    |
| 79        | VA0D1        | Atp6v0d1      | 11972        | 1.27        | 0.255        | 0.163        | ns        | V-type proton ATPase subunit d 1                                                      |
| 80        | VAMP2        | Vamp2         | 22318        | 1.12        | 0.715        | 0.810        | ns        | Vesicle-associated membrane protein 2                                                 |
| 81        | VATA         | Atp6v1a       | 11964        | 1.05        | 0.137        | 0.697        | ns        | V-type proton ATPase catalytic subunit A                                              |
| 82        | VATB2        | Atp6v1b2      | 11966        | 1.04        | 0.090        | 0.662        | ns        | V-type proton ATPase subunit B, brain isoform                                         |
| 83        | VATE1        | Atp6v1e1      | 11973        | 1.17        | 0.232        | 0.314        | ns        | V-type proton ATPase subunit E 1                                                      |
| 84        | VDAC1        | Vdac1         | 22333        | 1.00        | 0.367        | 0.954        | ns        | Voltage-dependent anion-selective channel protein 1                                   |
| 85        | VPP1         | Atp6v0a1      | 11975        | 1.19        | 0.156        | 0.144        | ns        | V-type proton ATPase 116 kDa subunit a isoform 1                                      |

List of proteins (85) identified and quantified in three independent experiments in WT and Fmr1 KO brain DRMs. Numbers highlighted in bold correspond to proteins with significantly different abundance in FMR1 KO rafts. Indicated are mean ratio of Fmr1 KO vs. WT (KO/WT), standard deviation (Sdev) and *p*-value (t-test) in relation to internal reference (HSP7C, mean ± sdev, 1.01 ± 0.064), with *p* < 0.05 considered significant. Entry descriptors: UniProtKB, UniProt Knowledgebase database (UniProtKB/Swiss-Prot) *Mus musculus* protein entry name; gene symbol, *Mus musculus*; Entrez Gene ID, National Center for Biotechnology Information (NCBI) Entrez *Mus musculus* gene ID.

doi:10.1371/journal.pone.0121464.t002

**Table 3. Gene ontology annotation of brain lipid raft proteome.**

| GOTERM_CC        | Term                                                           | Count | %     | P value  | Fold enrich. | Bonferroni | Benjamini |
|------------------|----------------------------------------------------------------|-------|-------|----------|--------------|------------|-----------|
| GO:0005886       | Plasma membrane                                                | 48    | 56.47 | 5.34E-11 | 2.45         | 1.09E-08   | 1.09E-08  |
| GO:0031225       | Anchored to membrane                                           | 14    | 16.47 | 9.19E-10 | 10.07        | 1.88E-07   | 9.37E-08  |
| GO:0045202       | Synapse                                                        | 13    | 15.29 | 1.18E-06 | 6.07         | 2.41E-04   | 3.44E-05  |
| GO:0005834       | Heterotrimeric G-protein complex                               | 6     | 7.06  | 3.17E-06 | 25.52        | 6.46E-04   | 8.08E-05  |
| GO:0042995       | Cell projection                                                | 16    | 18.82 | 4.84E-06 | 4.14         | 9.87E-04   | 9.87E-05  |
| <b>GOTERM_MF</b> | <b>Term</b>                                                    |       |       |          |              |            |           |
| GO:0015077       | Monovalent inorganic cation transmembrane transporter activity | 10    | 11.76 | 4.54E-10 | 22.46        | 7.77E-08   | 7.77E-08  |
| GO:0005516       | Calmodulin binding                                             | 10    | 11.76 | 5.16E-09 | 17.14        | 8.82E-07   | 4.41E-07  |
| GO:0015078       | Hydrogen ion transmembrane transporter activity                | 9     | 10.59 | 7.21E-09 | 21.45        | 1.23E-06   | 4.11E-07  |
| GO:0042625       | ATPase activity, coupled to transmembrane movement of ions     | 8     | 9.41  | 5.06E-08 | 22.66        | 8.66E-06   | 1.73E-06  |
| GO:0003924       | GTPase activity                                                | 9     | 10.59 | 2.41E-07 | 13.74        | 4.12E-05   | 5.89E-06  |
| GO:0016887       | ATPase activity                                                | 11    | 12.94 | 1.31E-06 | 7.65         | 2.23E-04   | 1.86E-05  |
| GO:0019911       | Structural constituent of myelin sheath                        | 3     | 3.5   | 7.49E-05 | 195.41       | 0.0127     | 8.53E-04  |
| <b>GOTERM_BP</b> | <b>Term</b>                                                    |       |       |          |              |            |           |
| GO:0006754       | ATP biosynthetic process                                       | 9     | 10.59 | 1.21E-08 | 20.15        | 9.99E-06   | 9.99E-06  |
| GO:0019226       | Transmission of nerve impulse                                  | 12    | 14.12 | 3.04E-08 | 9.75         | 2.50E-05   | 8.33E-06  |
| GO:0015985       | Energy coupled proton transport, down electrochemical gradient | 7     | 8.24  | 3.97E-08 | 34.74        | 3.27E-05   | 4.67E-06  |
| GO:0007268       | Synaptic transmission                                          | 10    | 11.76 | 4.38E-07 | 10.32        | 3.60E-04   | 1.80E-05  |
| GO:0006119       | Oxidative phosphorylation                                      | 7     | 8.24  | 5.12E-07 | 22.95        | 4.21E-04   | 2.00E-05  |
| GO:0006812       | Cation transport                                               | 14    | 16.47 | 3.07E-06 | 4.99         | 0.002      | 1.05E-04  |
| GO:0007155       | Cell adhesion                                                  | 14    | 16.47 | 7.80E-06 | 4.58         | 0.006      | 2.29E-04  |

Gene ontology (GO) terms annotation conducted with DAVID classification system (v. 6.7) using a list of proteins (85) identified and quantified in three independent experiments in WT and Fmr1 KO brain DRMs and *Mus musculus* genome reference background. Selected GO terms for Cellular Components (GOTERM\_CC), Molecular Function (GOTERM\_MF) and Biological Process (GOTERM\_BP) over-represented in genes included in brain raft proteome. *Term*, GO term description; *Count*, number of genes annotated with a given term; *%*, percentage of genes annotated with a given term; *P value*, significance of gene-term enrichment; *Fold enrichment*, geometric mean of all the enrichment *P* values of associated terms; *Bonferroni* and *Benjamini-Hochberg*, *P*-value correction. Redundant or broad GO terms associated with many genes are not listed.

doi:10.1371/journal.pone.0121464.t003

### Identification of proteins differentially enriched in brain lipid rafts of Fmr1 KO mice

To estimate with a degree of stringency differential raft association of individual protein hits in WT vs. Fmr1 KO mice, we restricted quantitative analysis to those proteins for which high confidence peptides were identified in each of three independent datasets (Table 2). We calculated for each protein a Fmr1 KO/WT ratio, with a ratio of 1 indicating no change and ratios >1 or <1 indicating increased or decreased raft association in Fmr1 KO brain, respectively and compared average ratios to an internal reference protein with ratio ~1 in all experiments. Although the majority of analyzed proteins appeared similarly represented in DRMs from Fmr1 KO vs. WT mice, seven proteins (~8.2% of quantified proteome) displayed statistically significant (mean ± SEM, *N* = 3, *p* < 0.05) differential abundance (Table 2). Among identified candidates, three showed decreased abundance in Fmr1 KO rafts (Lymphocyte antigen 6H, human *locus* LY6H, chromosome 8q24.3; Thy-1 membrane glycoprotein, human *locus* THY1, 11q23.3; CSPG2/Versican core protein, human *locus* VCAN, 5q14.2) whereas four were increased (ERC protein 2, human *locus* ERC2, chromosome 3p14.3; Myelin proteolipid protein/Plp1, human *locus* PLP1, Xq22; Tubulin beta-2A chain, human *locus* TUBB2A, 6p25.2; Tubulin beta 5 chain, human *locus* TUBB, 6p21.33). Interestingly, although the lipid raft proteome appeared

enriched in proteins encoded by RNA transcripts that are potential FMRP targets [8]—41 proteins of 133 present in the raft proteome (~31%; Table 4)—only one, Plp1 [8], showed differential abundance in DRMs (~1.2% of 85 quantified proteins).

To independently validate changes in association with lipid rafts detected by iTRAQ, we examined the abundance of selected candidate proteins in extracts (Fig 3) or DRMs (Fig 4) from cortex, hippocampus and cerebellum of individual Fmr1 KO and WT mice by Western blot. We focused on candidate proteins (Ly6h, Thy1, Plp1, CSPG2) that displayed more robust changes and for which specific antibodies are available. As control, we also examined the abundance of Homer-1b/c, a scaffold protein that interacts with Gp1 mGluRs [63] and the expression of which was shown to be unaffected in Fmr1 KO mouse brain [64, 65]. We found that expression of Ly6h, Thy-1 and Homer-1b/c did not significantly differ between genotypes in all brain regions examined (Fig 3) but noted a trend to increased abundance of Ly6h in the Fmr1 KO cortex that did not achieve statistical significance ( $p = 0.1338$ ). In contrast, Plp1 and CSPG2 showed significantly reduced abundance in Fmr1 KO mice in cortex and hippocampus, respectively (Fig 3). Analysis of CSPG2, which is encoded by different splice isoforms, was limited to the V3 form that could be readily detected in our conditions *vs.* other isoforms of very high molecular mass (>400 kDa). Since Plp1 is a potential FMRP target and alterations in protein levels in Fmr1 KO mice might arise from abnormal translation of mRNAs that bind FMRP, we also examined whether an independent FMRP target—CamKII $\alpha$  [66, 67]—displayed similarly altered expression and observed no significant difference in Fmr1 KO compared to WT (S1 Fig), in agreement with others [67].

Consistent with quantitative mass spectrometry, we found that Ly6h and Thy-1 abundance in DRMs was significantly reduced in the cortex of Fmr1 KO mice *vs.* WT (Fig 4) and observed a similar decrease in the hippocampus although in the case of Thy-1 it did not reach statistical significance (KO/WT,  $p = 0.0664$ ). We further confirmed the presence of Homer-1b/c in lipid raft-enriched membranes with similar abundance in Fmr1 KO and WT mouse cortex and hippocampus (Fig 4). Whereas Ly6h is not expressed in the cerebellum [68], we were unable to estimate Thy-1 and Homer-1b/c abundance in DRMs from cerebellum likely due to low expression in adult animals (Fig 3; [69]). In agreement with proteomic findings, Plp1 showed significantly increased abundance in DRMs from Fmr1 KO cortices (Fig 4) and appeared similarly increased in hippocampus and cerebellum in which though it did not reach statistical significance. CSPG2 expression in DRMs was not examined because the molecular complexity of native Versican (the form detected by mass spectrometry) precluded accurate analysis of high molecular mass isoforms in our experimental conditions. Collectively, these observations suggest that changes in lipid raft composition are not likely to be simply dictated by protein expression levels but may instead also arise from broader cellular dysfunctions in FMRP lacking cells.

Biological networks provide a valuable framework to integrate diverse information on protein properties arising from genome-wide proteomic studies and are particularly effective in enabling association of individual proteins/genes to complex functions. To obtain information on molecular networks and pathways that might be affected by abnormalities in lipid rafts, we performed network analysis with GeneMANIA [52] using as query four identified candidate genes: Erc2, Plp1, Thy1 and Vcan. Tubb2a and Tubb5 were omitted from combined analysis because of their broad functionality that could skew network weight, whereas we were unable to integrate Ly6h in pathways analysis due to paucity of molecular information available for this gene. Interestingly, network analysis highlighted connections between identified genes and predicted further functional connectivity with genes encoding components of myelin sheath, axon growth cones (and terminals) and axonal processes (Fig 5). Altogether, our findings could inform prioritization of studies aimed to identify salient molecular and cellular

**Table 4. Lipid raft associated proteins in WT and Fmr1 KO brain encoded by FMRP targets.**

| #  | Gene symbol |
|----|-------------|
| 1  | Actb        |
| 2  | Aldoa       |
| 3  | Atp1a1      |
| 4  | Atp1a3      |
| 5  | Atp1b1      |
| 6  | Atp5a1      |
| 7  | Atp5b       |
| 8  | Atp6v0a1    |
| 9  | Atp6v0d1    |
| 10 | Atp6v1b2    |
| 11 | Bsn         |
| 12 | Calm1       |
| 13 | Camk2a      |
| 14 | Camk2b      |
| 15 | Ckb         |
| 16 | Citc        |
| 17 | Cnp         |
| 18 | Dlg4        |
| 19 | Dlgap3      |
| 20 | Dpysl2      |
| 21 | Gnao1       |
| 22 | Gnas        |
| 23 | Gnaz        |
| 24 | Gnb1        |
| 25 | Hk1         |
| 26 | Iqsec2      |
| 27 | Mbp         |
| 28 | Myh10       |
| 29 | Myo5a       |
| 30 | Ncam1       |
| 31 | Ncan        |
| 32 | Pclo        |
| 33 | Plp1        |
| 34 | Sept4       |
| 35 | Shank3      |
| 36 | Snap25      |
| 37 | Syngap1     |
| 38 | Syt1        |
| 39 | Tubb3       |
| 40 | Vamp2       |
| 41 | Ywhag       |

Identified raft proteins that are encoded by RNA transcripts regulated by FMRP, based on a genome-wide HITS-CLIP study in mouse brain [8].

doi:10.1371/journal.pone.0121464.t004

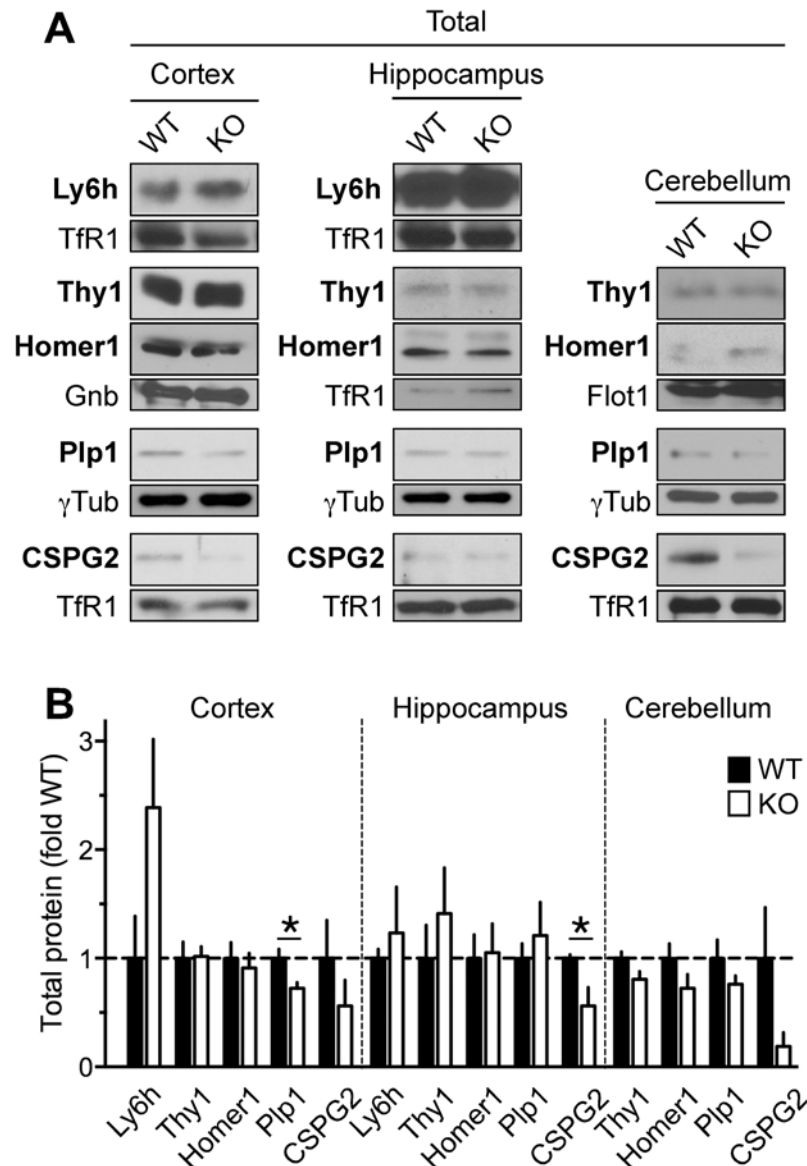

**Fig 3. Brain expression of candidate protein hits in Fmr1 KO and WT mice.** A) Representative immunoblots of extracts from cortices, hippocampi and cerebella of Fmr1 KO and WT mice probed with antibodies anti- Homer-1b/c (~ 45 kDa), -Ly6h (~15 kDa), -Plp1 (~ 32 kDa), Thy-1 (~ 25–37 kDa) and CSPG2 (~ 60 kDa). Protein loading was estimated by probing with either anti-TfR1, -γTubulin, -Flotillin or—Gnb2 depending on gel separation. B) Quantification of relative abundance of indicated proteins from experiments like those in (A) measured as ratio of loading control and normalized to WT. Means ± SEM, N = 3 for all groups except Homer-1b/c (cortex), Plp1 and CSPG2 (hippocampus) with N = 4. Unpaired t-test, \**p* < 0.05.

doi:10.1371/journal.pone.0121464.g003

dysfunctions arising from Fmr1 silencing and potentially contribute to uncovering of shared cellular pathologies between FXS and other disorders in the autism spectrum.

### Discussion

Here, we used an unbiased, genome-wide proteomic strategy to define the brain lipid raft proteome of Fmr1 knockout mice—an animal model of Fragile X syndrome—and test the hypothesis that raft association of subsets of proteins might be affected by homeostatic changes

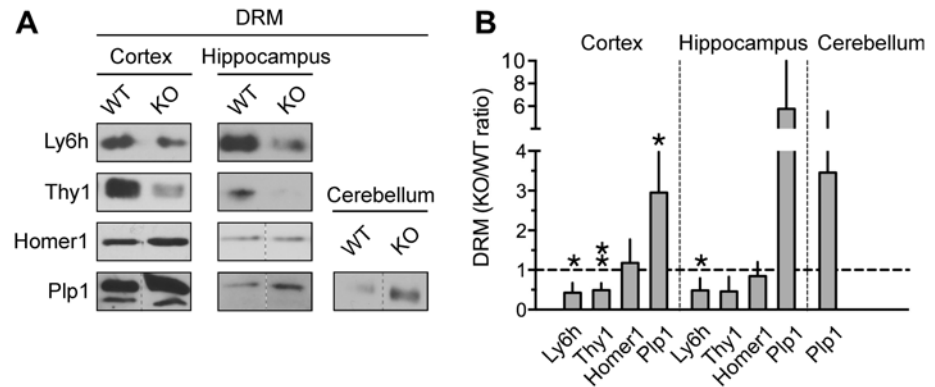

**Fig 4. Abundance of candidate protein hits in DRMs of Fmr1 KO and WT mice.** A) Representative immunoblots of combined DRM enriched fractions from individual cortices and cerebella or hippocampi pooled from two animals per group probed with antibodies anti- Homer-1b/c, -Ly6h, -Plp1 or-Thy-1. B) Quantification of relative abundance in DRMs of indicated proteins from experiments like those in (A) normalized to Flotillin content. Calculated KO/WT ratios of candidate proteins were compared to control Flotillin (KO/WT ratio, mean  $\pm$  SEM  $0.997 \pm 0.033$ ,  $N = 3$ ). Means  $\pm$  SEM,  $N = 3$  for all groups; unpaired t-test,  $*p < 0.05$ .

doi:10.1371/journal.pone.0121464.g004

occurring in absence of FMRP. We found that whereas overall proteome representation (~93%) is conserved, a discrete subset of proteins displays significantly altered abundance in DRMs of Fmr1 KO mice. Gene ontology and network analysis of proteins displaying abnormal abundance in absence of FMRP suggest convergence onto common cellular components and biological processes, such as axonal processes and myelination, emphasizing novel aspects of the complex biology of Fragile X syndrome and potentially other disorders in the autism spectrum.

The raft proteome shows an estimated maximum complexity of approximately 200 proteins based on studies carried out with different technologies and biological samples including HeLa cells [59], neonatal mouse brain [58] and human brain tissue [62]. Results from our study applying stringent criteria for protein assignment, identify 133 proteins in lipid-raft enriched membrane fractions of adult mouse brain, consistent with expected raft proteome complexity, and illustrate robust proteome coverage by iTRAQ despite incomplete peptide overlap among experiments that precluded quantitative analysis of all identified proteins. Observed variance in relative protein abundance reported by iTRAQ was modest (highest ratio difference ~1.5-fold, lowest ~0.6-fold) but of magnitude consistent with biologically relevant differences. Although iTRAQ offers a high degree of precision, it does not provide a measure of ‘absolute’ changes in protein abundance [47]: moreover, ratio compression can also arise from the fact that DRMs are a complex heterogeneous mixture of membranes extracted from different brain regions and cell types with potentially different properties.

We found that approximately 48% of the raft proteome, for which we could apply quantitation, is encoded by FMRP mRNA targets. Surprisingly, although absence of FMRP can lead to enhanced mRNA translation we found that only one identified FMRP target shows significantly increased abundance in DRMs of Fmr1 KO mice. Several mRNA targets of FMRP [8] encode proteins involved in lipid homeostasis, including lipid synthesis (e.g. PIGQ, FASN, SCD2, AGPAT3), metabolism (e.g. LPIN2, LPPR4, CPT1A, SMPD3), and cholesterol homeostasis (e.g. SREBF2, SCAP) and transport (e.g. LPR1, SORL1, ABCA3, LRP8). For example, PIGQ is involved in early steps of GPI anchor biosynthesis [70] and deficiencies in this pathway are linked to Mabry syndrome [71] marked by severe developmental delays and intellectual disability, autosomal recessive intellectual disability [72] and intractable epilepsy [73].



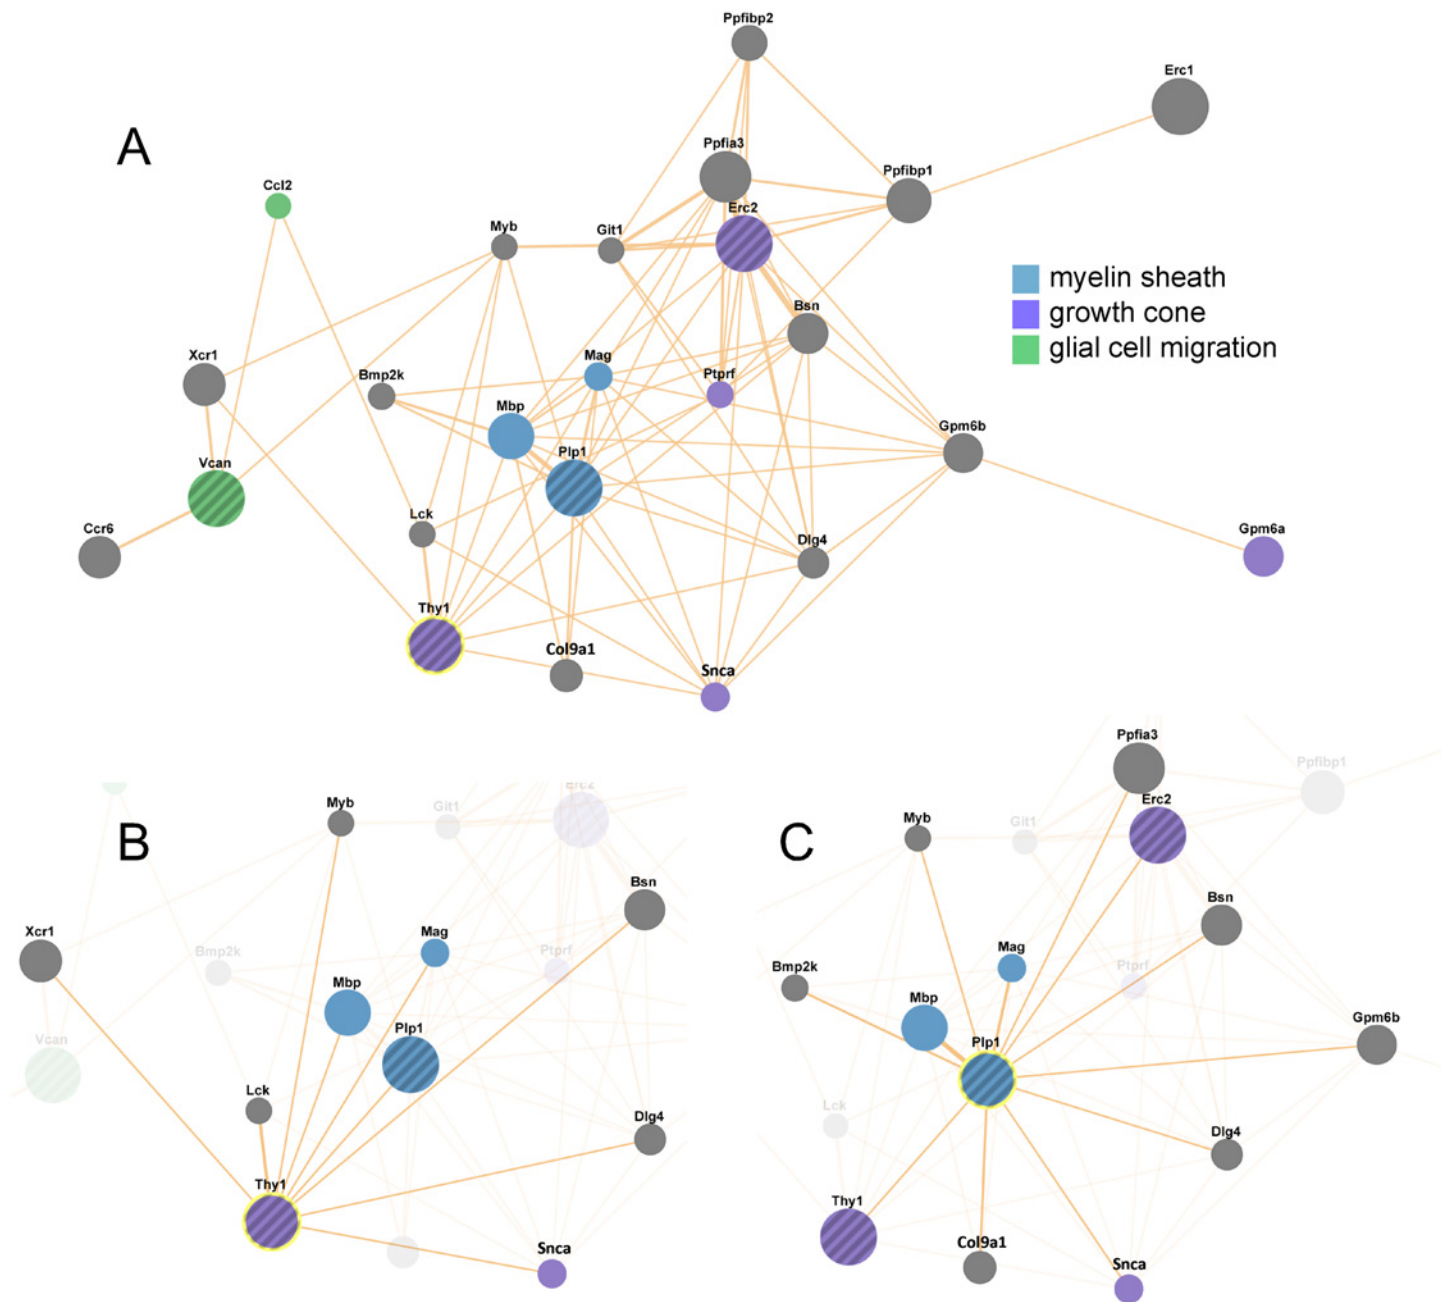

**Fig 5. Network analysis of selected proteins differentially enriched in brain lipid rafts of Fmr1 KO mice.** Network analysis constructed with GeneMANIA using four (Erc2, Plp1, Thy1, Vcan) of seven identified genes encoding proteins differentially expressed in brain lipid rafts of Fmr1 KO mice. Connections (cellular component based) are predicted based on annotated databases and indicated by links whereby thickness conveys degree of confidence of the relationship. A) Combined network view including four query genes with selected functions highlighted in color: myelin sheath (FDR 1.13e-2), growth cone (FDR 5.89e-4), glial cell migration (FDR 7.41e-2). Additional functions include axon part (FDR 4.17e-4), calcium ion transport ((FDR 8.98e-4), regulation of synaptic transmission (FDR 4.39e-3), positive regulation of lymphocyte activation (FDR 2.2.8e-2). B, C) Network views highlighting neighbours of Thy1 (B) or Plp1 (C).

doi:10.1371/journal.pone.0121464.g005

Notably, two GPI-linked proteins—Thy-1 and Ly6h —display altered abundance in Fmr1 KO rafts, suggesting the possibility that GPI biosynthesis may be compromised in absence of FMRP. Involvement of potential dysfunctions in lipid homeostasis in FXS is further suggested

by the findings that HMG-CoA reductase inhibitors that reduce cholesterol synthesis partly correct pathological dysfunctions in Fmr1 KO mice [74] and decrease Gp1 mGluR signaling to ERK1/2 in Fmr1 KO null neurons [57], lending indirect support for a potential role of the cholesterol biosynthetic pathway in FXS manifestations, at least in animal models.

An interesting observation arising from quantitative proteomics is that whereas a subset of proteins showed increased abundance in DRMs of Fmr1 KO mice, a group of proteins including Thy-1 and Ly6h displayed decreased raft association. Thy-1 is a developmentally regulated IgG-like protein enriched in neurons [75]. Although its precise functions and mechanisms of action remain unclear, Thy-1 was shown to inhibit neurite outgrowth and stabilize neuronal processes [76] *via* both cis- and trans-interactions between neuronal Thy-1 and  $\alpha_V\beta_3$  integrin in astrocytes, a mechanism contributing to Thy-1 impact on neurite outgrowth [77]. Importantly, lipid raft integrity and intact GPI anchor are required for Thy-1 actions. Thy1 knockout mice show impaired LTP in dentate gyrus [78] and behavioral abnormalities such as impaired social transmission of food preference [79] that are consistent with a critical function for this *locus* in neurodevelopment and neurodevelopmental disorders [80]. Ly6h, a GPI-anchored protein, is a member of the Ly6 complex—a protein family involved in immune regulation—encoded by  $\geq 20$  genes many of which cluster in human chromosome 8q24.3, a hot spot of deletion/duplication events linked to ASD and attention deficit hyperactivity disorder [81]. Ly6h expression in neurons is developmentally regulated and spatially restricted to specific brain regions (*e.g.* frontal cortex, hippocampus [68]). Although its function in the brain is unknown, the closely related Ly6/Neurotoxin 1 (Lynx1) was shown to modulate nAChRs functional properties and stabilize mature cortical networks [82]. Interestingly, peptides corresponding to Lynx1 were identified in DRMs by our study but not included in proteome data analysis on quality grounds. Outside the CNS, both Ly6h and Thy-1 are expressed in immune related cells including human cortical thymocytes and lymphoblastoid cell lines, suggesting the possibility that they could represent novel biomarkers for FXS and potentially other ASDs. In addition to GPI-linked proteins, another protein showing decreases raft association in Fmr1 KO mice is the versican core protein CSPG2/Vcan, a proteoglycan and a major component of extracellular matrix, with functions in cells adhesion and presynaptic maturation [83] among others.

Several proteins displayed increased abundance in brain rafts from Fmr1 KO mice, most prominently Plp1, an abundant component of CNS myelin, which plays a critical function in myelin formation and maintenance, oligodendrocyte development and axonal survival [84]. Mutations in PLP1 are linked to Pelizaeus-Merzbacher disease and spastic paraplegia (SPG2), conditions associated with intellectual disability and ASD [85]. Proteomic profiling also identified other protein components of the myelin sheath including CNP, MBP, MOBP and MOG all of which displayed a trend (not statistically significant) to increased abundance in Fmr1 KO rafts (Table 2). Consistent with this, network analysis highlights myelin sheath as a potential convergent pathway for identified protein with abnormal abundance in Fmr1 KO rafts. Myelination abnormalities are detected in FXS patients [86] and recent evidence indicates that FMRP is expressed in oligodendrocytes [87] and Fmr1 KO mice display delayed myelination during development [88]. Together, these observations suggest that dysfunctions of myelination at the cellular and/or circuitry level may play an important and unappreciated role in pathological manifestations of FXS.

An additional subset of proteins also appeared to be modestly increased in rafts from mutant Fmr1 mice including two tubulin beta chain isoforms, encoded by Tubb5 and Tubb2a respectively, and ERC2. Tubulin has been shown to associate with lipid rafts and disruption of the microtubule cytoskeleton can lead to remodeling of raft membrane composition [53]. ERC2 is enriched at the presynaptic active zone and implicated in organization of the

cytomatrix at synaptic terminals [89]: interestingly, the closely related ERC1 is associated with ASD [90].

The precise mechanisms underlying altered raft association in Fmr1 KO mice are at present unclear and they could involve changes in overall protein abundance or abnormalities in protein trafficking. Moreover, since DRMs are a heterogeneous mixture of membranes they do not allow to distinguish whether observed changes occur in defined cell populations and whether they are cell-autonomous or dependent on cell adhesion or trophic conditions in intact circuitry. Use of orthogonal strategies will be needed in the future to address these questions and further determine whether abnormalities in raft association reflect homeostatic adaptation in the adult brain (used in this study) and/or are present at early stages of brain development.

## Supporting Information

**S1 Fig. Brain expression of CaMKII $\alpha/\beta$  in Fmr1 KO and WT mice.** A) Representative immunoblots of cortical extracts from WT and Fmr1 KO mice probed with anti-CaMKII $\alpha/\beta$  and pan- $\beta$  Tubulin antibodies. B) Quantification of CaMKII $\alpha/\beta$  relative abundance from experiments like those in (A) measured as ratio of band densities for CaMKII $\alpha/\beta$  vs. tubulin and normalized to WT: means  $\pm$  SEM,  $N = 3$ , unpaired t-test,  $p = 0.157$  and  $p = 0.203$  for CaMKII $\alpha$  and CaMKII $\beta$  respectively.  
(TIF)

**S1 Table. List of peptides identified in WT and Fmr1 KO mouse brain.** Number of peptide matches and corresponding protein identified in three (A) two (B) or one (C) experiment. Columns E1-3 indicate number of peptide matches obtained for each protein hit: numbers in brackets indicate number of peptide used for ratio when calculated.  
(XLS)

## Acknowledgments

We thank Dr. Ranju Kumari for contributions at early stages of the project.

## Author Contributions

Conceived and designed the experiments: AF. Performed the experiments: AF MK CC. Analyzed the data: AF MK CC. Wrote the paper: AF MK.

## References

1. Neale BM, Kou Y, Liu L, Ma'ayan A, Samocha KE, Sabo A, et al. Patterns and rates of exonic de novo mutations in autism spectrum disorders. *Nature*. 2012; 485(7397):242–5. doi: [10.1038/nature11011](https://doi.org/10.1038/nature11011) PMID: [22495311](https://pubmed.ncbi.nlm.nih.gov/22495311/)
2. O'Roak BJ, Vives L, Girirajan S, Karakoc E, Krumm N, Coe BP, et al. Sporadic autism exomes reveal a highly interconnected protein network of de novo mutations. *Nature*. 2012; 485(7397):246–50. doi: [10.1038/nature10989](https://doi.org/10.1038/nature10989) PMID: [22495309](https://pubmed.ncbi.nlm.nih.gov/22495309/)
3. Geschwind DH, Levitt P. Autism spectrum disorders: developmental disconnection syndromes. *Curr Opin Neurobiol*. 2007; 17(1):103–11. PMID: [17275283](https://pubmed.ncbi.nlm.nih.gov/17275283/)
4. Jeste SS, Geschwind DH. Disentangling the heterogeneity of autism spectrum disorder through genetic findings. *Nat Rev Neurol*. 2014; 10(2):74–81. doi: [10.1038/nrneurol.2013.278](https://doi.org/10.1038/nrneurol.2013.278) PMID: [24468882](https://pubmed.ncbi.nlm.nih.gov/24468882/)
5. Nishimura Y, Martin CL, Vazquez-Lopez A, Spence SJ, Alvarez-Retuerto AI, Sigman M, et al. Genome-wide expression profiling of lymphoblastoid cell lines distinguishes different forms of autism and reveals shared pathways. *Hum Mol Genet*. 2007; 16(14):1682–98. PMID: [17519220](https://pubmed.ncbi.nlm.nih.gov/17519220/)
6. Hagerman RJ, Ono MY, Hagerman PJ. Recent advances in fragile X: a model for autism and neurodegeneration. *Curr Opin Psychiatry*. 2005; 18(5):490–6. PMID: [16639106](https://pubmed.ncbi.nlm.nih.gov/16639106/)

7. Penagarikano O, Mulle JG, Warren ST. The pathophysiology of fragile x syndrome. *Annu Rev Genomics Hum Genet.* 2007; 8:109–29. PMID: [17477822](#)
8. Darnell JC, Van Driesche SJ, Zhang C, Hung KY, Mele A, Fraser CE, et al. FMRP stalls ribosomal translocation on mRNAs linked to synaptic function and autism. *Cell.* 2011; 146(2):247–61. doi: [10.1016/j.cell.2011.06.013](#) PMID: [21784246](#)
9. Ascano M Jr., Mukherjee N, Bandaru P, Miller JB, Nusbaum JD, Corcoran DL, et al. FMRP targets distinct mRNA sequence elements to regulate protein expression. *Nature.* 2012; 492(7429):382–6. doi: [10.1038/nature11737](#) PMID: [23235829](#)
10. Maurin T, Zongaro S, Bardoni B. Fragile X Syndrome: From molecular pathology to therapy. *Neurosci Biobehav Rev.* 2014.
11. Bagni C, Greenough WT. From mRNP trafficking to spine dysmorphogenesis: the roots of fragile X syndrome. *Nat Rev Neurosci.* 2005; 6(5):376–87. PMID: [15861180](#)
12. Bassell GJ, Warren ST. Fragile X syndrome: loss of local mRNA regulation alters synaptic development and function. *Neuron.* 2008; 60(2):201–14. doi: [10.1016/j.neuron.2008.10.004](#) PMID: [18957214](#)
13. Dolen G, Osterweil E, Rao BS, Smith GB, Auerbach BD, Chattarji S, et al. Correction of fragile X syndrome in mice. *Neuron.* 2007; 56(6):955–62. PMID: [18093519](#)
14. Qin M, Kang J, Burlin TV, Jiang C, Smith CB. Postadolescent changes in regional cerebral protein synthesis: an in vivo study in the FMR1 null mouse. *J Neurosci.* 2005; 25(20):5087–95. PMID: [15901791](#)
15. Kelley DJ, Davidson RJ, Elliott JL, Lahvis GP, Yin JC, Bhattacharyya A. The cyclic AMP cascade is altered in the fragile X nervous system. *PLoS One.* 2007; 2(9):e931. PMID: [17895972](#)
16. Berry-Kravis E, Sklena P. Demonstration of abnormal cyclic AMP production in platelets from patients with fragile X syndrome. *Am J Med Genet.* 1993; 45(1):81–7. PMID: [8380312](#)
17. Hu H, Qin Y, Bochorishvili G, Zhu Y, van Aelst L, Zhu JJ. Ras signaling mechanisms underlying impaired GluR1-dependent plasticity associated with fragile X syndrome. *J Neurosci.* 2008; 28(31):7847–62. doi: [10.1523/JNEUROSCI.1496-08.2008](#) PMID: [18667617](#)
18. Osterweil EK, Krueger DD, Reinhold K, Bear MF. Hypersensitivity to mGluR5 and ERK1/2 leads to excessive protein synthesis in the hippocampus of a mouse model of fragile X syndrome. *J Neurosci.* 2010; 30(46):15616–27. doi: [10.1523/JNEUROSCI.3888-10.2010](#) PMID: [21084617](#)
19. Hou L, Antion MD, Hu D, Spencer CM, Paylor R, Klann E. Dynamic translational and proteasomal regulation of fragile X mental retardation protein controls mGluR-dependent long-term depression. *Neuron.* 2006; 51(4):441–54. PMID: [16908410](#)
20. Gross C, Bassell GJ. Excess protein synthesis in FXS patient lymphoblastoid cells can be rescued with a p110beta-selective inhibitor. *Mol Med.* 2012; 18:336–45. doi: [10.2119/molmed.2011.00363](#) PMID: [22207187](#)
21. Gross C, Nakamoto M, Yao X, Chan CB, Yim SY, Ye K, et al. Excess phosphoinositide 3-kinase subunit synthesis and activity as a novel therapeutic target in fragile X syndrome. *J Neurosci.* 2010; 30(32):10624–38. doi: [10.1523/JNEUROSCI.0402-10.2010](#) PMID: [20702695](#)
22. Sharma A, Hoeffler CA, Takayasu Y, Miyawaki T, McBride SM, Klann E, et al. Dysregulation of mTOR signaling in fragile X syndrome. *J Neurosci.* 2010; 30(2):694–702. doi: [10.1523/JNEUROSCI.3696-09.2010](#) PMID: [20071534](#)
23. Hoeffler CA, Sanchez E, Hagerman RJ, Mu Y, Nguyen DV, Wong H, et al. Altered mTOR signaling and enhanced CYFIP2 expression levels in subjects with fragile X syndrome. *Genes Brain Behav.* 2012; 11(3):332–41. doi: [10.1111/j.1601-183X.2012.00768.x](#) PMID: [22268788](#)
24. Ronesi JA, Huber KM. Homer interactions are necessary for metabotropic glutamate receptor-induced long-term depression and translational activation. *J Neurosci.* 2008; 28(2):543–7. doi: [10.1523/JNEUROSCI.5019-07.2008](#) PMID: [18184796](#)
25. Wang H, Wu LJ, Kim SS, Lee FJ, Gong B, Toyoda H, et al. FMRP acts as a key messenger for dopamine modulation in the forebrain. *Neuron.* 2008; 59(4):634–47. doi: [10.1016/j.neuron.2008.06.027](#) PMID: [18760699](#)
26. Lingwood D, Simons K. Lipid rafts as a membrane-organizing principle. *Science.* 2010; 327(5961):46–50. doi: [10.1126/science.1174621](#) PMID: [20044567](#)
27. Levental I, Grzybek M, Simons K. Greasing their way: lipid modifications determine protein association with membrane rafts. *Biochemistry.* 2010; 49(30):6305–16. doi: [10.1021/bi100882y](#) PMID: [20583817](#)
28. Gao X, Lowry PR, Zhou X, Depry C, Wei Z, Wong GW, et al. PI3K/Akt signaling requires spatial compartmentalization in plasma membrane microdomains. *Proc Natl Acad Sci U S A.* 2011; 108(35):14509–14. doi: [10.1073/pnas.1019386108](#) PMID: [21873248](#)
29. Simons K, Toomre D. Lipid rafts and signal transduction. *Nat Rev Mol Cell Biol.* 2000; 1:31–9. PMID: [11413487](#)

30. Simons K, Ikonen E. Functional rafts in cell membranes. *Nature*. 1997; 387(6633):569–72. PMID: [9177342](#)
31. Lichtenberg D, Goni FM, Heerklotz H. Detergent-resistant membranes should not be identified with membrane rafts. *Trends Biochem Sci*. 2005; 30(8):430–6. PMID: [15996869](#)
32. Ledesma MD, Brugger B, Bunning C, Wieland FT, Dotti CG. Maturation of the axonal plasma membrane requires upregulation of sphingomyelin synthesis and formation of protein-lipid complexes. *EMBO J*. 1999; 18(7):1761–71. PMID: [10202140](#)
33. Ledesma MD, Simons K, Dotti CG. Neuronal polarity: essential role of protein-lipid complexes in axonal sorting. *Proc Natl Acad Sci U S A*. 1998; 95(7):3966–71. PMID: [9520476](#)
34. Guirland C, Zheng JQ. Membrane lipid rafts and their role in axon guidance. *Adv Exp Med Biol*. 2007; 621:144–55. doi: [10.1007/978-0-387-76715-4\\_11](#) PMID: [18269217](#)
35. Takemoto-Kimura S, Ageta-Ishihara N, Nonaka M, Adachi-Morishima A, Mano T, Okamura M, et al. Regulation of dendritogenesis via a lipid-raft-associated Ca<sup>2+</sup>/calmodulin-dependent protein kinase CLICK-III/CaMKIgamma. *Neuron*. 2007; 54(5):755–70. PMID: [17553424](#)
36. Hering H, Lin CC, Sheng M. Lipid rafts in the maintenance of synapses, dendritic spines, and surface AMPA receptor stability. *J Neurosci*. 2003; 23(8):3262–71. PMID: [12716933](#)
37. Gielen E, Baron W, Vandeven M, Steels P, Hoekstra D, Ameloot M. Rafts in oligodendrocytes: evidence and structure-function relationship. *Glia*. 2006; 54(6):499–512. PMID: [16927294](#)
38. Debruin LS, Harauz G. White matter rafting—membrane microdomains in myelin. *Neurochem Res*. 2007; 32(2):213–28. PMID: [17031566](#)
39. Jiang L, Fang J, Moore DS, Gogichaeva NV, Galeva NA, Michaelis ML, et al. Age-associated changes in synaptic lipid raft proteins revealed by two-dimensional fluorescence difference gel electrophoresis. *Neurobiol Aging*. 2008.
40. Korade Z, Kenworthy AK. Lipid rafts, cholesterol, and the brain. *Neuropharmacology*. 2008; 55(8):1265–73. doi: [10.1016/j.neuropharm.2008.02.019](#) PMID: [18402986](#)
41. Molander-Melin M, Blennow K, Bogdanovic N, Dellheden B, Mansson JE, Fredman P. Structural membrane alterations in Alzheimer brains found to be associated with regional disease development; increased density of gangliosides GM1 and GM2 and loss of cholesterol in detergent-resistant membrane domains. *J Neurochem*. 2005; 92(1):171–82. PMID: [15606906](#)
42. Behan AT, Byrne C, Dunn MJ, Cagney G, Cotter DR. Proteomic analysis of membrane microdomain-associated proteins in the dorsolateral prefrontal cortex in schizophrenia and bipolar disorder reveals alterations in LAMP, STXB1 and BASP1 protein expression. *Mol Psychiatry*. 2009; 14(6):601–13. doi: [10.1038/mp.2008.7](#) PMID: [18268500](#)
43. Donati RJ, Dwivedi Y, Roberts RC, Conley RR, Pandey GN, Rasenick MM. Postmortem brain tissue of depressed suicides reveals increased Gs alpha localization in lipid raft domains where it is less likely to activate adenylyl cyclase. *J Neurosci*. 2008; 28(12):3042–50. doi: [10.1523/JNEUROSCI.5713-07.2008](#) PMID: [18354007](#)
44. Rakheja D, Boriack RL. Precholesterol sterols accumulate in lipid rafts of patients with Smith-Lemli-Opitz syndrome and X-linked dominant chondrodysplasia punctata. *Pediatr Dev Pathol*. 2008; 11(2):128–32. PMID: [17378665](#)
45. Bukelis I, Porter FD, Zimmerman AW, Tierney E. Smith-Lemli-Opitz syndrome and autism spectrum disorder. *Am J Psychiatry*. 2007; 164(11):1655–61. PMID: [17974928](#)
46. Sikora DM, Pettit-Kekel K, Penfield J, Merkens LS, Steiner RD. The near universal presence of autism spectrum disorders in children with Smith-Lemli-Opitz syndrome. *Am J Med Genet A*. 2006; 140(14):1511–8. PMID: [16761297](#)
47. Ross PL, Huang YN, Marchese JN, Williamson B, Parker K, Hattan S, et al. Multiplexed protein quantitation in *Saccharomyces cerevisiae* using amine-reactive isobaric tagging reagents. *Mol Cell Proteomics*. 2004; 3(12):1154–69. PMID: [15385600](#)
48. Francesconi A, Kumari R, Zukin RS. Regulation of group I metabotropic glutamate receptor trafficking and signaling by the caveolar/lipid raft pathway. *J Neurosci*. 2009; 29(11):3590–602. doi: [10.1523/JNEUROSCI.5824-08.2009](#) PMID: [19295163](#)
49. Kumari R, Francesconi A. Identification of GPCR localization in detergent resistant membranes. *Methods Mol Biol*. 2011; 746:411–23. doi: [10.1007/978-1-61779-126-0\\_24](#) PMID: [21607872](#)
50. Huang da W, Sherman BT, Lempicki RA. Systematic and integrative analysis of large gene lists using DAVID bioinformatics resources. *Nat Protoc*. 2009; 4(1):44–57. doi: [10.1038/nprot.2008.211](#) PMID: [19131956](#)
51. Huang da W, Sherman BT, Lempicki RA. Bioinformatics enrichment tools: paths toward the comprehensive functional analysis of large gene lists. *Nucleic Acids Res*. 2009; 37(1):1–13. doi: [10.1093/nar/gkn923](#) PMID: [19033363](#)

52. Zuberi K, Franz M, Rodriguez H, Montojo J, Lopes CT, Bader GD, et al. GeneMANIA prediction server 2013 update. *Nucleic Acids Res.* 2013; 41(Web Server issue):W115–22. doi: [10.1093/nar/gkt533](https://doi.org/10.1093/nar/gkt533) PMID: [23794635](https://pubmed.ncbi.nlm.nih.gov/23794635/)
53. Allen JA, Halverson-Tamboli RA, Rasenick MM. Lipid raft microdomains and neurotransmitter signaling. *Nat Rev Neurosci.* 2007; 8(2):128–40. PMID: [17195035](https://pubmed.ncbi.nlm.nih.gov/17195035/)
54. Straiker A, Min KT, Mackie K. Fmr1 deletion enhances and ultimately desensitizes CB(1) signaling in autaptic hippocampal neurons. *Neurobiol Dis.* 2013; 56:1–5. doi: [10.1016/j.nbd.2013.04.002](https://doi.org/10.1016/j.nbd.2013.04.002) PMID: [23578490](https://pubmed.ncbi.nlm.nih.gov/23578490/)
55. Irwin SA, Idupulapati M, Gilbert ME, Harris JB, Chakravarti AB, Rogers EJ, et al. Dendritic spine and dendritic field characteristics of layer V pyramidal neurons in the visual cortex of fragile-X knockout mice. *Am J Med Genet.* 2002; 111(2):140–6. PMID: [12210340](https://pubmed.ncbi.nlm.nih.gov/12210340/)
56. Kokubo H, Helms JB, Ohno-Iwashita Y, Shimada Y, Horikoshi Y, Yamaguchi H. Ultrastructural localization of flotillin-1 to cholesterol-rich membrane microdomains, rafts, in rat brain tissue. *Brain Res.* 2003; 965(1–2):83–90.
57. Kumari R, Castillo C, Francesconi A. Agonist-dependent signaling by group I metabotropic glutamate receptors is regulated by association with lipid domains. *J Biol Chem.* 2013; 288(44):32004–19. doi: [10.1074/jbc.M113.475863](https://doi.org/10.1074/jbc.M113.475863) PMID: [24045944](https://pubmed.ncbi.nlm.nih.gov/24045944/)
58. Yu H, Wakim B, Li M, Halligan B, Tint GS, Patel SB. Quantifying raft proteins in neonatal mouse brain by 'tube-gel' protein digestion label-free shotgun proteomics. *Proteome Sci.* 2007; 5:17. PMID: [17892558](https://pubmed.ncbi.nlm.nih.gov/17892558/)
59. Foster LJ, De Hoog CL, Mann M. Unbiased quantitative proteomics of lipid rafts reveals high specificity for signaling factors. *Proc Natl Acad Sci U S A.* 2003; 100(10):5813–8. PMID: [12724530](https://pubmed.ncbi.nlm.nih.gov/12724530/)
60. Chadwick W, Brenneman R, Martin B, Maudsley S. Complex and multidimensional lipid raft alterations in a murine model of Alzheimer's disease. *Int J Alzheimers Dis.* 2010; 2010:604792. doi: [10.4061/2010/604792](https://doi.org/10.4061/2010/604792) PMID: [21151659](https://pubmed.ncbi.nlm.nih.gov/21151659/)
61. Jia JY, Lamer S, Schumann M, Schmidt MR, Krause E, Haucke V. Quantitative proteomics analysis of detergent-resistant membranes from chemical synapses: evidence for cholesterol as spatial organizer of synaptic vesicle cycling. *Mol Cell Proteomics.* 2006; 5(11):2060–71. PMID: [16861260](https://pubmed.ncbi.nlm.nih.gov/16861260/)
62. Martosella J, Zolotarjova N, Liu H, Moyer SC, Perkins PD, Boyes BE. High recovery HPLC separation of lipid rafts for membrane proteome analysis. *J Proteome Res.* 2006; 5(6):1301–12. PMID: [16739982](https://pubmed.ncbi.nlm.nih.gov/16739982/)
63. Fagni L. Diversity of metabotropic glutamate receptor-interacting proteins and pathophysiological functions. *Adv Exp Med Biol.* 2012; 970:63–79. doi: [10.1007/978-3-7091-0932-8\\_3](https://doi.org/10.1007/978-3-7091-0932-8_3) PMID: [22351051](https://pubmed.ncbi.nlm.nih.gov/22351051/)
64. Giuffrida R, Musumeci S, D'Antoni S, Bonaccorso CM, Giuffrida-Stella AM, Oostra BA, et al. A reduced number of metabotropic glutamate subtype 5 receptors are associated with constitutive homer proteins in a mouse model of fragile X syndrome. *J Neurosci.* 2005; 25(39):8908–16. PMID: [16192381](https://pubmed.ncbi.nlm.nih.gov/16192381/)
65. Ronesi JA, Collins KA, Hays SA, Tsai NP, Guo W, Birnbaum SG, et al. Disrupted Homer scaffolds mediate abnormal mGluR5 function in a mouse model of fragile X syndrome. *Nat Neurosci.* 2012; 15(3):431–40, S1. doi: [10.1038/nn.3033](https://doi.org/10.1038/nn.3033) PMID: [22267161](https://pubmed.ncbi.nlm.nih.gov/22267161/)
66. Zalfa F, Giorgi M, Primerano B, Moro A, Di Penta A, Reis S, et al. The fragile X syndrome protein FMRP associates with BC1 RNA and regulates the translation of specific mRNAs at synapses. *Cell.* 2003; 112(3):317–27. PMID: [12581522](https://pubmed.ncbi.nlm.nih.gov/12581522/)
67. Muddashetty RS, Kelic S, Gross C, Xu M, Bassell GJ. Dysregulated metabotropic glutamate receptor-dependent translation of AMPA receptor and postsynaptic density-95 mRNAs at synapses in a mouse model of fragile X syndrome. *J Neurosci.* 2007; 27(20):5338–48. PMID: [17507556](https://pubmed.ncbi.nlm.nih.gov/17507556/)
68. Thomsen MS, Cinar B, Jensen MM, Lyukmanova EN, Shulepko MA, Tsetlin V, et al. Expression of the Ly-6 family proteins Lynx1 and Ly6H in the rat brain is compartmentalized, cell-type specific, and developmentally regulated. *Brain Struct Funct.* 2013.
69. Shiraishi Y, Mizutani A, Yuasa S, Mikoshiba K, Furuichi T. Differential expression of Homer family proteins in the developing mouse brain. *J Comp Neurol.* 2004; 473(4):582–99. PMID: [15116392](https://pubmed.ncbi.nlm.nih.gov/15116392/)
70. Tiede A, Schubert J, Nischan C, Jensen I, Westfall B, Taron CH, et al. Human and mouse Gpi1p homologues restore glycosylphosphatidylinositol membrane anchor biosynthesis in yeast mutants. *Biochem J.* 1998; 334 (Pt 3):609–16. PMID: [9729469](https://pubmed.ncbi.nlm.nih.gov/9729469/)
71. Horn D, Krawitz P, Mannhardt A, Korenke GC, Meinecke P. Hyperphosphatasia-mental retardation syndrome due to PIGV mutations: expanded clinical spectrum. *Am J Med Genet A.* 2011; 155A(8):1917–22. doi: [10.1002/ajmg.a.34102](https://doi.org/10.1002/ajmg.a.34102) PMID: [21739589](https://pubmed.ncbi.nlm.nih.gov/21739589/)
72. Hansen L, Tawamie H, Murakami Y, Mang Y, ur Rehman S, Buchert R, et al. Hypomorphic mutations in PGAP2, encoding a GPI-anchor-remodeling protein, cause autosomal-recessive intellectual disability. *Am J Hum Genet.* 2013; 92(4):575–83. doi: [10.1016/j.ajhg.2013.03.008](https://doi.org/10.1016/j.ajhg.2013.03.008) PMID: [23561846](https://pubmed.ncbi.nlm.nih.gov/23561846/)

73. Nakamura K, Osaka H, Murakami Y, Anzai R, Nishiyama K, Kodera H, et al. PIGO mutations in intractable epilepsy and severe developmental delay with mild elevation of alkaline phosphatase levels. *Epilepsia*. 2014; 55(2):e13–7. doi: [10.1111/epi.12508](https://doi.org/10.1111/epi.12508) PMID: [24417746](https://pubmed.ncbi.nlm.nih.gov/24417746/)
74. Osterweil EK, Chuang SC, Chubykin AA, Sidorov M, Bianchi R, Wong RK, et al. Lovastatin corrects excess protein synthesis and prevents epileptogenesis in a mouse model of fragile X syndrome. *Neuron*. 2013; 77(2):243–50. doi: [10.1016/j.neuron.2012.01.034](https://doi.org/10.1016/j.neuron.2012.01.034) PMID: [23352161](https://pubmed.ncbi.nlm.nih.gov/23352161/)
75. Morris R. Thy-1 in developing nervous tissue. *Dev Neurosci*. 1985; 7(3):133–60. PMID: [2866949](https://pubmed.ncbi.nlm.nih.gov/2866949/)
76. Mahanthappa NK, Patterson PH. Thy-1 involvement in neurite outgrowth: perturbation by antibodies, phospholipase C, and mutation. *Dev Biol*. 1992; 150(1):47–59. PMID: [1347021](https://pubmed.ncbi.nlm.nih.gov/1347021/)
77. Herrera-Molina R, Frischknecht R, Maldonado H, Seidenbecher CI, Gundelfinger ED, Hetz C, et al. Astrocytic alphaVbeta3 integrin inhibits neurite outgrowth and promotes retraction of neuronal processes by clustering Thy-1. *PLoS One*. 2012; 7(3):e34295. doi: [10.1371/journal.pone.0034295](https://doi.org/10.1371/journal.pone.0034295) PMID: [22479590](https://pubmed.ncbi.nlm.nih.gov/22479590/)
78. Nosten-Bertrand M, Errington ML, Murphy KP, Tokugawa Y, Barboni E, Kozlova E, et al. Normal spatial learning despite regional inhibition of LTP in mice lacking Thy-1. *Nature*. 1996; 379(6568):826–9. PMID: [8587606](https://pubmed.ncbi.nlm.nih.gov/8587606/)
79. Mayeux-Portas V, File SE, Stewart CL, Morris RJ. Mice lacking the cell adhesion molecule Thy-1 fail to use socially transmitted cues to direct their choice of food. *Curr Biol*. 2000; 10(2):68–75. PMID: [10662668](https://pubmed.ncbi.nlm.nih.gov/10662668/)
80. Parikshak NN, Luo R, Zhang A, Won H, Lowe JK, Chandran V, et al. Integrative functional genomic analyses implicate specific molecular pathways and circuits in autism. *Cell*. 2013; 155(5):1008–21. doi: [10.1016/j.cell.2013.10.031](https://doi.org/10.1016/j.cell.2013.10.031) PMID: [24267887](https://pubmed.ncbi.nlm.nih.gov/24267887/)
81. Stam AJ, Schothorst PF, Vorstman JA, Staal WG. The genetic overlap of attention deficit hyperactivity disorder and autistic spectrum disorder. *Appl Clin Genet*. 2009; 2:7–13. PMID: [23935378](https://pubmed.ncbi.nlm.nih.gov/23935378/)
82. Morishita H, Miwa JM, Heintz N, Hensch TK. Lynx1, a cholinergic brake, limits plasticity in adult visual cortex. *Science*. 2010; 330(6008):1238–40. doi: [10.1126/science.1195320](https://doi.org/10.1126/science.1195320) PMID: [21071629](https://pubmed.ncbi.nlm.nih.gov/21071629/)
83. Yamagata M, Sanes JR. Versican in the developing brain: lamina-specific expression in interneuronal subsets and role in presynaptic maturation. *J Neurosci*. 2005; 25(37):8457–67. PMID: [16162928](https://pubmed.ncbi.nlm.nih.gov/16162928/)
84. Nave KA. Myelination and support of axonal integrity by glia. *Nature*. 2010; 468(7321):244–52. doi: [10.1038/nature09614](https://doi.org/10.1038/nature09614) PMID: [21068833](https://pubmed.ncbi.nlm.nih.gov/21068833/)
85. Inoue K. PLP1-related inherited dysmyelinating disorders: Pelizaeus-Merzbacher disease and spastic paraplegia type 2. *Neurogenetics*. 2005; 6(1):1–16. PMID: [15627202](https://pubmed.ncbi.nlm.nih.gov/15627202/)
86. Hoelt F, Carter JC, Lightbody AA, Cody Hazlett H, Piven J, Reiss AL. Region-specific alterations in brain development in one- to three-year-old boys with fragile X syndrome. *Proc Natl Acad Sci U S A*. 2010; 107(20):9335–9. doi: [10.1073/pnas.1002762107](https://doi.org/10.1073/pnas.1002762107) PMID: [20439717](https://pubmed.ncbi.nlm.nih.gov/20439717/)
87. Giampetruzzi A, Carson JH, Barbarese E. FMRP and myelin protein expression in oligodendrocytes. *Mol Cell Neurosci*. 2013; 56:333–41. doi: [10.1016/j.mcn.2013.07.009](https://doi.org/10.1016/j.mcn.2013.07.009) PMID: [23891804](https://pubmed.ncbi.nlm.nih.gov/23891804/)
88. Pacey LK, Xuan IC, Guan S, Sussman D, Henkelman RM, Chen Y, et al. Delayed myelination in a mouse model of fragile X syndrome. *Hum Mol Genet*. 2013; 22(19):3920–30. doi: [10.1093/hmg/ddt246](https://doi.org/10.1093/hmg/ddt246) PMID: [23740941](https://pubmed.ncbi.nlm.nih.gov/23740941/)
89. Ko J, Na M, Kim S, Lee JR, Kim E. Interaction of the ERC family of RIM-binding proteins with the liprin-alpha family of multidomain proteins. *J Biol Chem*. 2003; 278(43):42377–85. PMID: [12923177](https://pubmed.ncbi.nlm.nih.gov/12923177/)
90. Thevenon J, Callier P, Andrieux J, Delobel B, David A, Sukno S, et al. 12p13.33 microdeletion including ELKS/ERC1, a new locus associated with childhood apraxia of speech. *Eur J Hum Genet*. 2013; 21(1):82–8. doi: [10.1038/ejhg.2012.116](https://doi.org/10.1038/ejhg.2012.116) PMID: [22713806](https://pubmed.ncbi.nlm.nih.gov/22713806/)
